# Supplementary material for: Exercise-Induced Alterations in Skeletal Muscle, Heart, Liver, and Serum Metabolome Identified by Non-Targeted Metabolomics Analysis
Source: MDPI journal article supplement (doi:10.3390/metabo7030040), 2017-08-08
Supplement: s1 [file s1]

# Supplementary Materials: Exercise-Induced Alterations in Skeletal Muscle, Heart, Liver, and Serum Metabolome Identified by Non-Targeted Metabolomics Analysis

Joseph W. Starnes<sup>1,†</sup>, Traci L. Parry<sup>2,3,†</sup>, Sara K. O'Neal<sup>4</sup>, James R. Bain<sup>4,5</sup>, Michael J. Muehlbauer<sup>5</sup>, Aubree Honcoop<sup>6</sup>, Amro Ilaiwy<sup>4,5</sup>, Peter M. Christopher<sup>1</sup>, Cam Patterson<sup>7</sup>, Monte S. Willis<sup>2,3,8</sup>

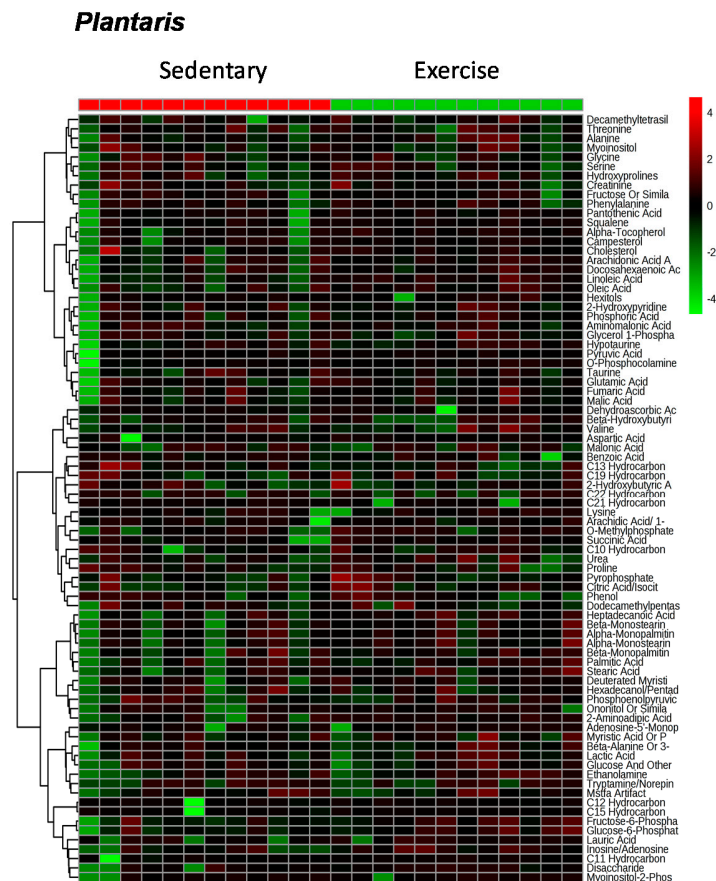

**Figure S1.** Non-targeted metabolomics analysis of exercise-trained and sedentary control rat plantaris muscle. Heatmap of metabolites identified by GC-MS in the heart.  $N = 12/\text{group}$ .

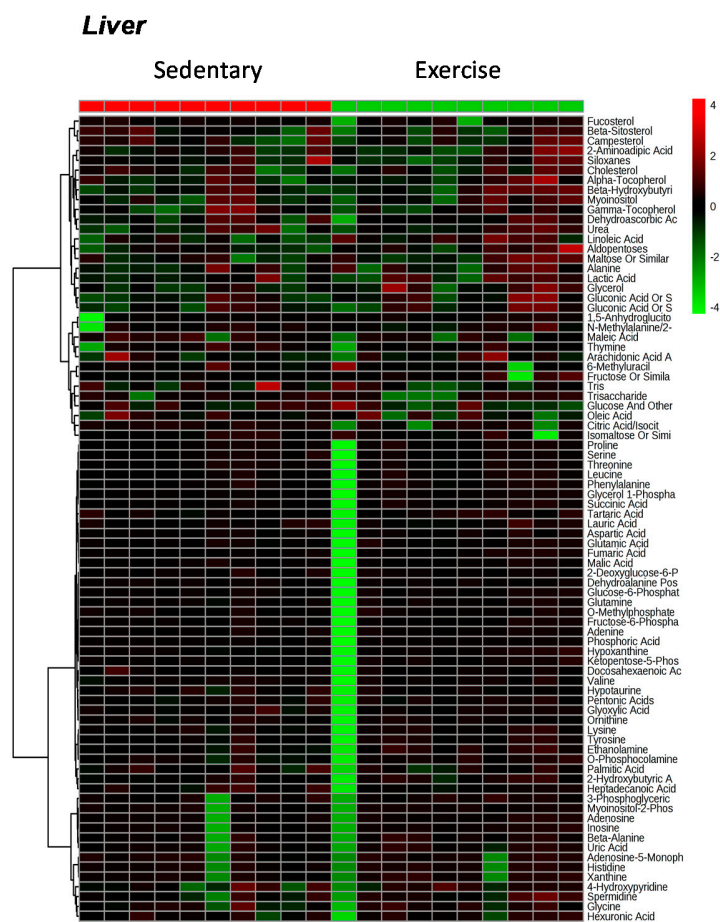

**Figure S2.** Non-targeted metabolomics analysis of exercise-trained and sedentary control rat liver. Heatmap of metabolites identified by GC-MS in the heart.  $N = 12/\text{group}$ .

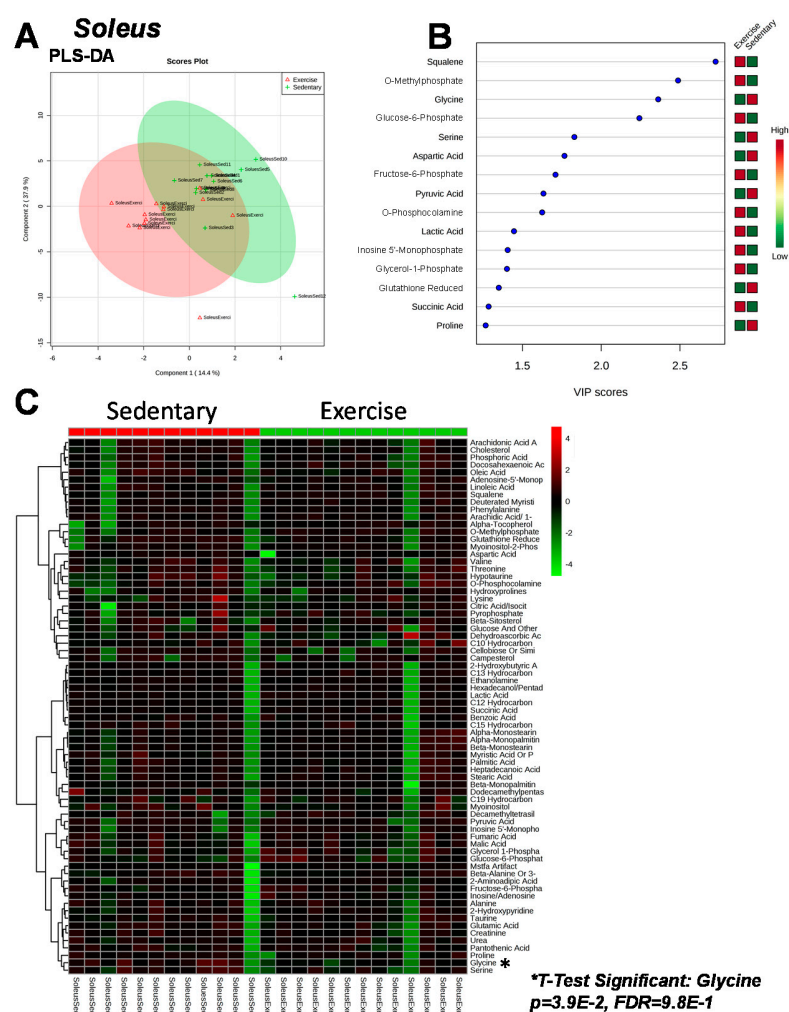

**Figure S3.** Non-targeted metabolomics analysis of exercise-trained and sedentary control rat soleus muscle. **(A)** Principal components analysis using PLS-DA. **(B)** Variable importance in projection (VIP) scores. **(C)** Heatmap of metabolites identified by GC-MS in the heart. \* $P < 0.05$ .  $N = 12/\text{group}$ .

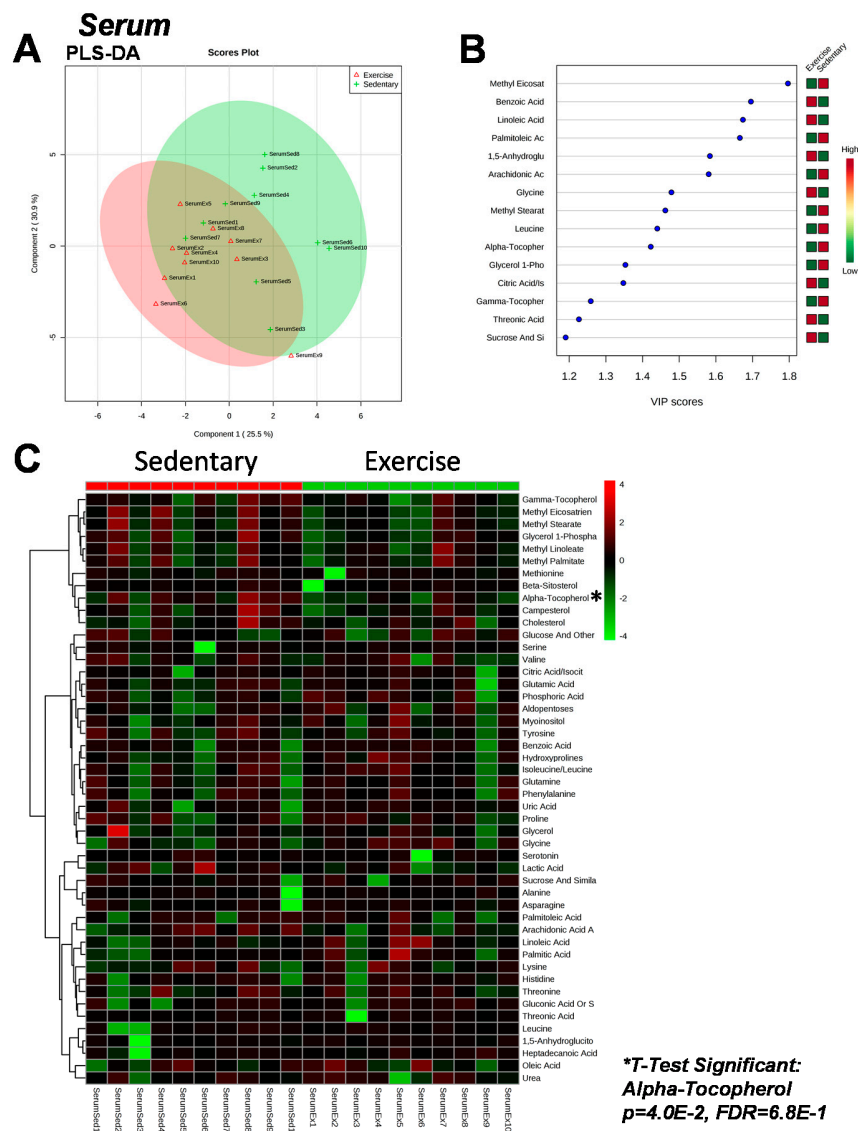

**Figure S4.** Non-targeted metabolomics analysis of exercise-trained and sedentary control rat serum. (A) Principal components analysis using PLS-DA. (B) Variable importance in projection (VIP) scores. (C) Heatmap of metabolites identified by GC-MS in the heart. \* $P < 0.05$ .  $N = 12/\text{group}$ .

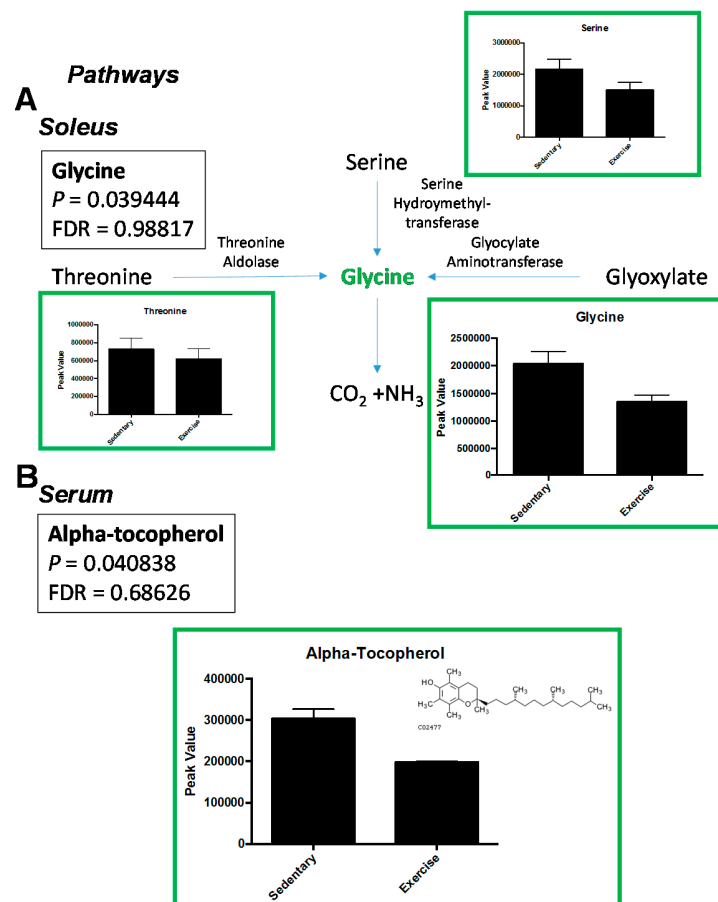

**Figure S5.** Pathway analysis of *t*-test significant metabolites in exercise-trained soleus muscle and serum. (A) Alterations in soleus muscle glycine (and other non-significant identified metabolites) identified in the pathway. (B) Alterations in serum alpha-tocopherol. Data represent mean  $\pm$  SEM. \* $P < 0.05$ .  $N = 12$ /group.

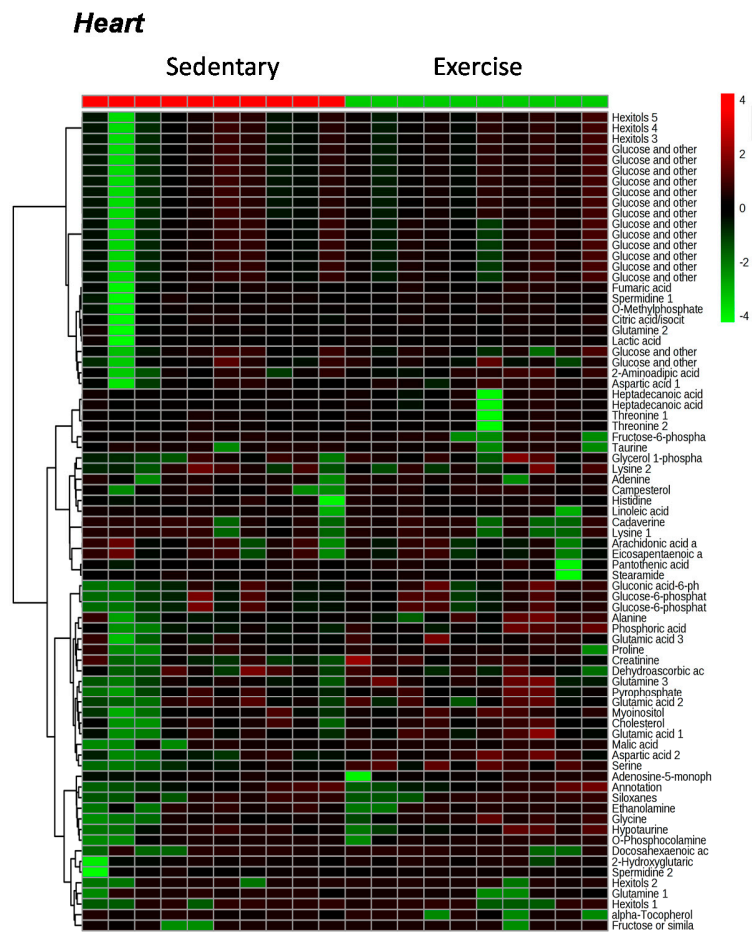

**Figure S6.** Non-targeted metabolomics analysis of exercise-trained and sedentary control rat heart. Heatmap of metabolites identified by GC-MS in the heart.  $N = 12/\text{group}$ .

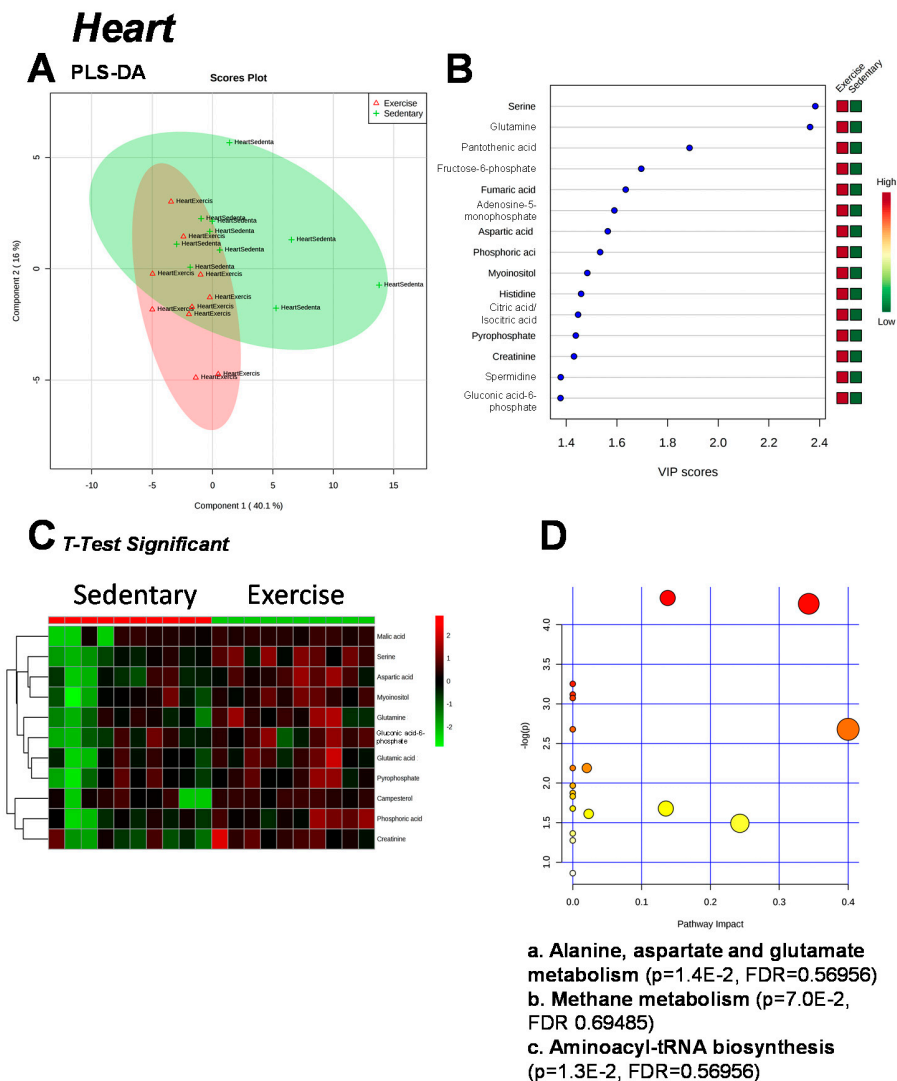

**Figure S7.** Non-targeted metabolomics analysis of exercise-trained and sedentary control rat heart. (A) Principal components analysis using PLS-DA. (B) Variable importance in projection (VIP) scores. (C) *t*-Test significant heatmap of metabolites identified by GC-MS in the heart. (D) Pathway analysis using *t*-test significant metabolites identifying alanine, aspartate, and glutamate metabolism as highly enriched. \* $P < 0.05$ .  $N = 12$ /group.

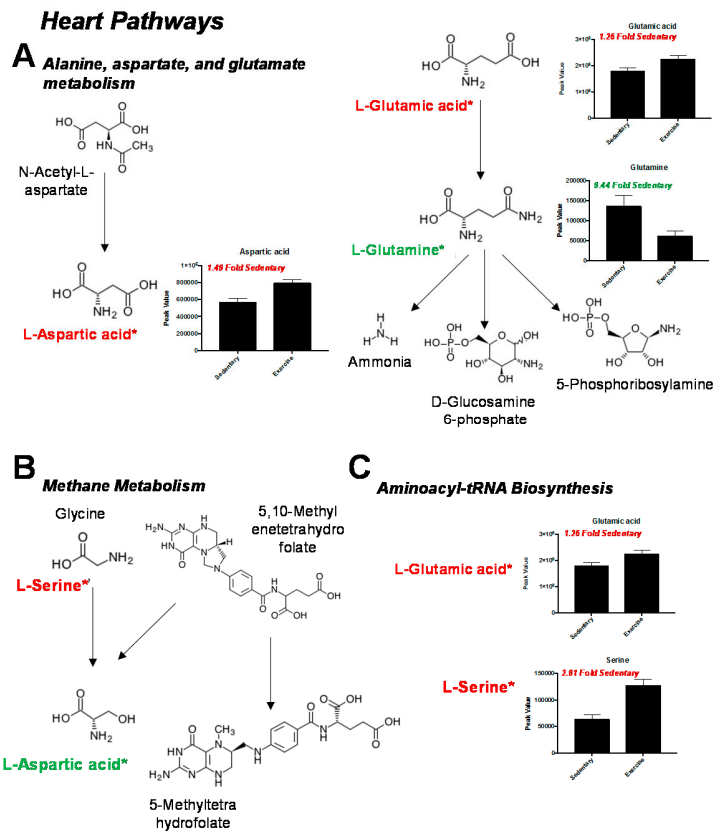

**Figure S8.** Pathway analysis of t-test significant metabolites identified by GC-MS in exercise-trained heart. (A) Alanine, aspartate, and glutamate metabolism. (B) Methane metabolism. (C) Aminoacyl-tRNA Biosynthesis. Data represent mean  $\pm$  SEM. \* $P < 0.05$ .  $N = 12/\text{group}$ .



## Heart

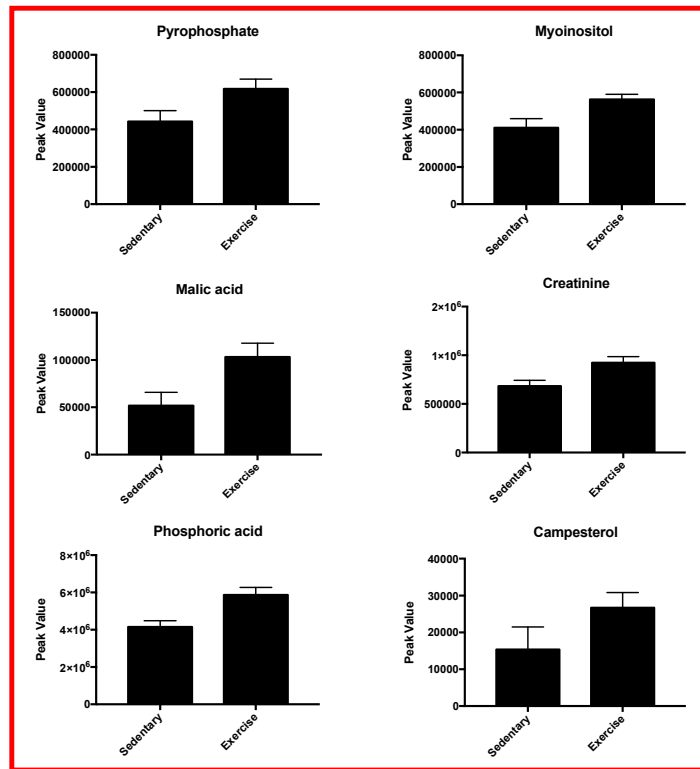

Increased\*  
Decreased\*

**Figure S9.** *t*-Test significant metabolites from heart. Data represent mean  $\pm$  SEM. \* $P < 0.05$ .  $N = 12/\text{group}$ .
