# Supplementary material for: Exercise-Induced Alterations in Skeletal Muscle, Heart, Liver, and Serum Metabolome Identified by Non-Targeted Metabolomics Analysis
Source: Metabolites. 2017 Aug 8;7(3):40. doi: 10.3390/metabo7030040 (PMC5618325; doi:10.3390/metabo7030040)
Supplement: Supplementary file 1 [file metabolites-07-00040-s001.zip › metabolites-214484-publish-supplemtent-figures.docx]

Supplementary Materials: Exercise-Induced Alterations in Skeletal Muscle, Heart, Liver, and Serum Metabolome Identified by Non-Targeted Metabolomics Analysis

Joseph W. Starnes 1,✝, Traci L. Parry 2,3,✝, Sara K. O’Neal 4, James R. Bain 4,5, Michael J. Muehlbauer 5, Aubree Honcoop 6, Amro Ilaiwy 4,5, Peter M. Christopher 1, Cam Patterson 7, Monte S. Willis 2,3,8

**Figure S1.** Non-targeted metabolomics analysis of exercise-trained and sedentary control rat plantaris muscle. Heatmap of metabolites identified by GC-MS in the heart. *N* = 12/group.

**Figure S2.** Non-targeted metabolomics analysis of exercise-trained and sedentary control rat liver. Heatmap of metabolites identified by GC-MS in the heart. *N* = 12/group.

**Figure S3.** Non-targeted metabolomics analysis of exercise-trained and sedentary control rat soleus muscle. **(A**)Principal components analysis using PLS-DA. (**B**)Variable importance in projection (VIP) scores. (**C**) Heatmap of metabolites identified by GC-MS in the heart. **P* < 0.05. *N* = 12/group.

**Figure S4.** Non-targeted metabolomics analysis of exercise-trained and sedentary control rat serum.(**A**) Principal components analysis using PLS-DA. (**B**)Variable importance in projection (VIP) scores. (**C**) Heatmap of metabolites identified by GC-MS in the heart. **P* < 0.05. *N* = 12/group.

**Figure S5.** Pathway analysis of *t*-test significant metabolites in exercise-trained soleus muscle and serum.(**A**) Alterations in soleus muscle glycine (and other non-significant identified metabolites) identified in the pathway. (**B**) Alterations in serum alpha-tocopherol. Data represent mean ± SEM. **P* < 0.05. *N* = 12/group.

**Figure S6.** Non-targeted metabolomics analysis of exercise-trained and sedentary control rat heart.Heatmap of metabolites identified by GC-MS in the heart. *N* = 12/group.

**Figure S7.** Non-targeted metabolomics analysis of exercise-trained and sedentary control rat heart. (**A**) Principal components analysis using PLS-DA. (**B**) Variable importance in projection (VIP) scores. (**C**)*t*-Test significant heatmap of metabolites identified by GC-MS in the heart. (**D**) Pathway analysis using *t*-test significant metabolites identifying alanine, aspartate, and glutamate metabolism as highly enriched. **P* < 0.05. *N* = 12/group.

**Figure S8.** Pathway analysis of t-test significant metabolites identified by GC-MS in exercise-trained heart.(**A**)Alanine, aspartate, and glutamate metabolism. (**B**)Methane metabolism. (**C**) Aminoacyl-tRNA Biosynthesis. Data represent mean ± SEM. **P* < 0.05. *N* = 12/group.

**Figure S9.** *t*-Test significant metabolites from heart. Data represent mean ± SEM. **P* < 0.05. *N* = 12/group.
