# Supplementary material for: Exercise-Induced Alterations in Skeletal Muscle, Heart, Liver, and Serum Metabolome Identified by Non-Targeted Metabolomics Analysis
Source: Metabolites. 2017 Aug 8;7(3):40. doi: 10.3390/metabo7030040 (PMC5618325; doi:10.3390/metabo7030040)
Supplement: Supplementary file 1 [file metabolites-07-00040-s001.zip › metabolites-214484-publish-supplemtent-table.xlsx]

## Sheet: Supp Table 1.1
Sample	Plantaris Sed 1	Plantaris Sed 2	Plantaris Sed 3	Plantaris Sed 4	Plantaris Sed 5	Plantaris Sed 6	Plantaris Sed 7	Plantaris Sed 8	Plantaris Sed 9	Plantaris Sed 10	Plantaris Sed 11	Plantaris Sed 12	Plantaris Exercise 1	Plantaris Exercise 2	Plantaris Exercise 3	Plantaris Exercise 4	Plantaris Exercise 5	Plantaris Exercise 6	Plantaris Exercise 7	Plantaris Exercise 8	Plantaris Exercise 9	Plantaris Exercise 10	Plantaris Exercise 11	Plantaris Exercise 12
Label	A Sedentary	A Sedentary	A Sedentary	A Sedentary	A Sedentary	A Sedentary	A Sedentary	A Sedentary	A Sedentary	A Sedentary	A Sedentary	A Sedentary	B Exercise	B Exercise	B Exercise	B Exercise	B Exercise	B Exercise	B Exercise	B Exercise	B Exercise	B Exercise	B Exercise	B Exercise
O-Methylphosphate		16.37		12.36	14.07	12.99	13.92	15.47	15.62	13.72			17.59	15.71	15.03	15.82	15.18	14.96		11.38	15.41	14.1	15.61	14.64
Tryptamine/Norepinephrine				12.71	13.09	12.63		13.75	12.93	12.96	12.26	12.03			12.15			13.03	12.9	13.78		12.98	12.58	12.14
Beta-Hydroxybutyric Acid		15.57		14.22	14.6	14.05	13.99	14.3	16.08	15.86		16.98	14.27	15.49					16.69	16.12	16.79	18.42	14.06	15.23
Lauric Acid	13.17		14.52	13.98	14.7		13.13	13.47	13.38		13.23	13.72	14.37		12.95	15.34	15.07	14.62	13.54	13.59	14.02	13.66	14.07	13.85
Ononitol Or Similar Methoxyinositol		14.84	16.43	16.09	15.36	16.28			15.59	15.26	14.57	15.85	14.65	14.78	15.59	14.23	14.6	15.97	15.54	16.65	15.93	16.29	15.14
C22 Hydrocarbon	13.92	14.17	14.27		14.41	14.27	14.47		14.41	13.89	13.79		14.25	13.31		14.15		14.13		14.65		14.58	14.52	14.35
Disaccharide			14.69	13.59	13.82		15.7	14.11	13.56	12.9	13.76	13.71	12.34	13.86	13.72	14.65	14.68	15.17	14.68	14.82	14.85	11.65	12.95	13.76
Alpha-Tocopherol		14.72	12.95		11.78	14.3	13.87	14.59	14.3	14.49		14.91	14.63	15.65	14.4	13.56	14.77	13.46	14.3	14.98	14.99	14.01	12.86	14.48
Campesterol		17.03	15.27		15.54	15.45	15.05	16.56	16.4	16.4		16.04	15.63	15.03	15.75	14.72	15.74	14.84	14.31	15.87	16.28	16	15.19	14.73
Phenol	17.61	17.82	18.13	16.91	15.65	15.52	14.83		13.86	13.48		12.42	19.26	21.3	17.37	16.4	15.71	15.47	13.98	13.41			13.69
Succinic Acid	16.61	18.82	17.19	14.33	16.89	17.69	17.49	17.65	17.08	16.12			19.16	18.51	17.73	16.77	17.94	16.97	17.43	16.77	19.2	17.62	16.24	17.24
Fructose Or Similar Ketohexose		16.45	15.31	16.63	15.37	13.5	14.88	15.55	16.29	14.76		14.38	14.72	13.4	14.93	14.31	14.08	13.66	13.33	15.71	16.41	15.58		14.23
Pantothenic Acid		15.3	14.52	13.55	14.62	15.42	15.24	15.52	15.81	15.15		14.61	16.03	15.21	15.21	14.14	15.86	14.83	13.16	14.2	16.15	15.47	14.89	15.07
Myoinositol-2-Phosphate			15.71	14.6	14.95	15.52	15.16	15.58	14.72	15.63	15.26	15.74	14.98	14.74		14.43	15.06	15.33	15.91	16.09	15.24	15.84	15.55	15.62
Squalene		16.88	14.87	13.97	14.99	15.66	14.23	17.04	16.07	15.41		16.13	16.32	16.28	15.94	14.94	16.34	15.84	15.41	15.87	16.97	15.8	16.12	16.2
Pyruvic Acid		16.8	16.23	16.11	16.88	16.69	16.79	16.32	16.37	17.54	15.44	17.73	16.75	16.97	16.55	17.12	17.12	17	16.53	17.47	16.1	16.32	16.08	16.78
C11 Hydrocarbon	14.95		15.11	13.8	15.01	15.34	14.91	14.73	14.71	14.98	14.7	14.54	14.94	14.87	15.2	15	15.08	15.36	15.49	14.94	15.29	15.07	14.7	14.8
C12 Hydrocarbon	13.99	14	14.27	14.11	14.16		13.85	13.9	14.31	14.23	13.13	13.54	14.28	13.51	14.4	14.24	13.98	14.27	14.04	13.91	13.87	13.33	13.65	14.25
C15 Hydrocarbon	16.94	16.52	16.72	16.37	16.55		16.44	16.67	16.66	16.69	16.41	15.21	16.98	16.36	16.7	16.73	16.55	16.91	16.59	16.62	16.54	16.51	16.5	16.68
Aspartic Acid	15.62	18		16.23	16.89	16.8	16.93	16.95	16.86	17.11	15.44	16.56	17.88	17.22	17.28	16.77	16.57	16.6	17.01	16.49	17.32	17.45	16.56	16.58
O-Phosphocolamine		16.32	15.83	16.16	16.38	17.21	16.9	17.45	17.31	17.12	16.4	17.82	16.16	16.85	16.43	16.86	17.61	16.95	17.46	17.54	18.17	17.91	17.6	17.56
Lysine	14.52	14.93	15.7	14.62	16.28	14.75	12.98	17.1	16.8	16.76	15.46			13.88	13.3	16.79	15.32	14.79	15.6	16.92	15.37	17	16.56	16.21
Hexitols		16.16	16.27	15.54	15.78	15.85	16.12	16.43	14.95	16.59	15.54	15.72	15.81	15.22	15.29		15.56	15.67	16.63	17.02	16.46	18.26	15.13	15.79
Arachidic Acid/ 1-Heneicosanol	13.34	15.17	15	13.48	14.62	15.15	12.74	14.71	14.89	14.92	13.88		13.67	14.56	14.44	14.24	14.88	12.48	14.34	14.59	14.62	13.83	13.59	15.37
Adenosine-5'-Monophosphate Or Inosine 5'-Monophosphate	17.42	20.21	21.8	20.04	21.36	21.85		21.75	21.77	20.81	17.39	21.75		19.78	19.97	20.6	22.08	21.97	20.64	21.67	21.55	21.93	21.85	21.66
C10 Hydrocarbon	14.82	14.78	14.65	14.44	13.28	14.11	14.46	14.29	14.37	14.6	14.43	14.08	14.9	14.38	14.54	14.06	14.19	14.62	14.64	14.67	14.65	14.62	14.22	14.29
Decamethyltetrasiloxane	14.44	14.82	14.72	14.4	14.8	14.69	14.53	14.71	14	14.59	14.52	14.6	14.83	14.5	14.67	14.39	14.55	14.55	14.7	14.66	14.91	14.72	14.45	14.55
2-Hydroxypyridine	15.58	16.77	16.62	16.37	16.24	16.77	16.46	16.53	16.38	16.77	16.09	16.61	16.38	16.35	16.55	16.29	16.49	16.38	16.89	16.81	16.66	16.38	16.24	16.42
Lactic Acid	24.22	25.35	26.42	26.01	25.6	26.23	25.48	26.26	25.71	25.57	25.13	25.87	24.52	25.32	25.51	25.21	26.15	26.01	26.43	26.57	26.16	25.51	25.44	25.96
Alanine	19.29	20.96	20.46	20.23	20.03	20.49	20.36	20.51	20.03	20.43	19.72	20.21	20.45	20.51	20.32	20.47	20.7	19.81	20.91	21.05	21.1	20.05	19.79	20.45
2-Hydroxybutyric Acid	21.51	21.3	21.22	21.33	21.47	21.35	20.94	21.17	21.28	20.94	21.06	21.09	21.68	21.02	21.05	21.22	21.1	21.21	21.11	21.32	21.3	21.27	21.21	21.38
Dodecamethylpentasiloxane	16.2	17.66	17.19	17.05	17.4	17.05	17.28	17.22	17.19	16.8	16.64	17.15	17.13	17.51	16.53	17.68	17.01	17.17	16.91	16.8	16.61	17.12	17.06	16.75
Malonic Acid	18.4	18.39	16.93	16.42	19.22	19.24	19.32	19.03	17.59	19.33	19.27	17.68	17.07	16.57	19	19.23	18.93	17.15	19.54	19.51	17.84	19.02	19.03	17.37
Valine	16.21	17.06	17.18	16.71	16.78	17.13	17.5	18.19	18.1	18.37	16.62	17.46	16.71	16.91	16.56	17.23	16.35	15.86	18.83	17.72	18.99	18.02	17.01	17.5
Urea	22.35	23.45	23.06	22.67	22.55	23.15	22.14	23.05	23.14	22.95	21.97	22.16	23.3	23.17	22.97	22.69	23.49	23.09	23.86	22.46	23.86	23.04	21.65	22.18
Benzoic Acid	17.29	17.35	17.31	17.03	17.34	17.02	17.25	17.25	17.32	17.33	17.3	16.99	17.06	17.16	17.01	17.4	17.27	17.26	17.13	17.48	16.76	17.2	16.05	17.03
Ethanolamine	15.97	16.52	16.84	17.45	17.89	18.87	17.85	19.17	18.8	18.73	17.66	19.24	16.5	17.13	17.86	17.75	18.47	18.99	18.55	19.05	19.46	19.28	19.15	18.71
Phosphoric Acid	24.32	26.04	26.03	25.78	25.76	26.21	25.24	26.13	25.73	25.94	25.09	26.25	25.56	25.64	25.72	25.6	26	25.73	26.1	26.32	26.04	25.88	25.64	25.85
C13 Hydrocarbon	16.58	16.9	16.79	16.39	16.54	16.55	16.52	16.34	16.49	16.6	16.45	16.29	16.4	16.35	16.41	16.38	16.39	16.62	16.56	16.26	16.12	16.3	16.27	16.65
Proline	16.5	15.91	16.21	15.81	15.18	15.82	15.21	15.88	15.13	14.72	14.87	14.94	16.27	16.02	15.46	15.84	15.61	14.93	15.98	14.84	16.46	14.13	14.05	14.94
Glycine	20.91	21.86	22.75	22.75	22.4	22.84	22.33	21.83	21.58	22.26	22	22.29	22.4	22.21	22.68	22.04	21.58	21.59	22.5	22.53	21.92	22.15	21.51	22.26
Mstfa Artifact	16.6	16.9	17.15	17.48	17.29	17.49	17.24	17.18	17.26	17.76	17.72	17.56	16.88	16.78	16.95	17.17	16.99	17.35	17.77	17.86	17.28	17.19	17.42	17.39
Fumaric Acid	14.86	17.81	17.12	16.98	16.66	17.64	17.04	18.27	17.36	16.83	16.25	17.46	17.3	17.38	17.13	16.99	17.78	17.01	17.4	17.28	18.48	17.49	16.91	17.32
Serine	18.75	20.29	20.46	20.3	19.86	20.36	19.62	19.9	18.92	19.64	18.97	19.94	20.45	20.39	20.37	20.1	20.1	19.01	19.96	20.09	19.79	19.82	18.77	19.41
Threonine	19.12	19.96	20.17	19.85	19.75	20.11	19.85	20.63	19.54	20.35	19.03	20.22	20.22	19.91	20	19.64	19.56	18.91	20.58	20.39	20.11	19.91	19.32	20.02
Beta-Alanine Or 3-Aminoisobutyric Acid	14.13	17.23	18	17.82	17.62	18.23	17.6	17.33	17.25	17.64	17.45	17.56	16.3	16.77	16.95	16.67	17.17	17.33	18.77	18.88	17.82	17.04	17.23	18.36
Aminomalonic Acid	13.04	16.72	17.57	17.41	17.63	17.44	16.1	16.09	15.73	16.91	15.35	16.78	16.98	16.52	17.07	16.22	16.29	17.28	17.22	17.69	16.26	16.72	15.51	16.63
Malic Acid	18.54	20.97	20.48	20.32	19.72	20.5	20.23	21.09	20.14	20	19.72	20.43	20.41	20.52	20.24	19.94	20.83	19.86	20.48	20.23	21.31	20.45	20.02	20.23
Glutamic Acid	20	22.31	22.03	21.94	21.72	22	21.76	22.12	21.3	21.85	21.21	22.28	22.19	22.07	21.9	21.61	22.14	21.52	21.7	21.76	22.08	21.8	21.51	21.94
Hydroxyprolines	15.71	17	17.21	16.73	16.94	17.31	16.2	16.6	15.87	16.46	16.17	16.56	17.16	16.93	16.91	16.57	16.69	16.46	17.12	17.3	16.44	16.96	16.04	16.77
Creatinine	22.71	23.6	23.26	23.22	23.02	23.01	23.07	23.21	22.87	22.81	22.63	22.89	23.55	22.93	23.16	22.94	23.1	23.01	23.13	23.1	23.19	22.91	22.44	22.88
Phosphoenolpyruvic Acid	12.88	13.9	16.93	16.07	16.29	15.75	13.35	13.66	16.28	14.74	14.86	14.63	14.24	13.92	13.97	15.83	14.94	16.69	15.55	15.91	14.21	15.84	15.82	15.15
Hypotaurine	13.6	17.74	17.47	17.36	17.67	18.35	18.78	18.61	18.12	18.65	17.21	19.01	17.19	17.57	17.11	17.35	18.33	17.81	18.93	18.88	18.73	18.75	18.04	18.5
Phenylalanine	14.59	16.59	16.66	16.46	16.36	16.56	16.14	16.64	16.09	16.34	14.97	15.8	16.65	16.48	16.26	16.48	16.4	16.03	16.91	16.67	16.29	16.56	15.09	15.73
Pyrophosphate	16.58	20.07	16.68	15.75	17.4	17.4	16.52	15.7	15.52	18.52	14.96	17.43	20.98	19.87	19	18.27	16.84	16.74	15.53	16.32	16.85	16.3	17.06	17.55
Taurine	20.31	22.71	22.42	22.62	21.75	23.25	23.94	23.63	22.94	23	22.57	23.65	23.19	23.01	22.83	22.52	23.21	22.42	23.17	22.88	23.46	23.08	22.05	22.88
2-Aminoadipic Acid	18.33	18.95	19.92	19.84	19.65	20.3	18.75	17.86	20.36	20.12	18.43	20.43	20.27	20.14	20.28	20.07	20.04	20.24	19.6	20.03	19.95	20.36	20.1	20.19
Glycerol 1-Phosphate	19.46	21.66	21.61	21.6	21.5	21.32	20.92	21.13	20.9	21.71	20.66	21.53	21.54	20.81	21.29	20.47	20.82	21.18	22.12	21.64	21.57	20.98	20.93	21.04
Citric Acid/Isocitric Acid	15.53	18.1	15.52	15.59	15.7	16.65	16.25	15.5	15.71	17.2	15.6	16.51	18.11	18.36	17.39	15.81	16.78	15.7	16.42	16.67	17.24	17.28	16.21	16.85
Deuterated Myristic Acid (Rtl Std)	21.27	22.52	22.49	22.28	22.45	22.47	21.15	22.2	22.38	22.57	21.47	22.49	22.66	22.18	22.37	22.48	22.26	22.56	21.71	22.5	22.34	22.47	22.37	22.43
Dehydroascorbic Acid	14.2	17.11	16.77	16.76	16.42	16.64	16.95	16.96	15.22	16.73	14.54	17.03	17.16	16.97	16.89	16.31	16.88		16.47	16.62	17.01	16.48	15.97	16.53
Myristic Acid Or Pentadecanol	18.66	19.18	19.24	18.98	19.17	19.3	18.9	19.05	19.08	19.17	18.95	19.32	18.79	18.95	19.25	19.13	19.19	19.23	18.9	19.52	19	19.15	18.86	19.35
Glucose And Other Aldohexoses	21.08	21.31	23.56	23.28	22.88	23.2	22.47	23.5	22.98	22.77	22.26	22.97	20.69	21.83	22.37	21.97	22.67	23.06	23.48	23.86	22.89	22.81	22.38	23.12
C19 Hydrocarbon	16.35	16.42	15.84	15.56	15.42	14.98	15.57	15.55	15.21	14.94	15.98	15.65	16.43	15.35	15.7	16.2	15.74	16.2	15.56	15.1	15.14	15.42	15.43	16.11
Hexadecanol/Pentadecanoic Acid	15.07	15.4	15.6	15.56	15.66	15.76	15.03	15.38	15.67	15.92	15.35	15.49	15.73	15.33	15.51	15.65	15.57	15.86	15.22	15.38	15.5	15.6	15.55	15.6
Palmitic Acid	22.29	22.56	22.9	22.44	22.81	23.02	22.38	22.86	22.97	23.07	22.64	23.02	22.7	22.62	22.77	22.67	22.95	22.87	22.74	23.01	22.92	22.98	22.91	23.1
Myoinositol	19.19	21.33	20.77	20.21	19.91	20.04	19.62	20.39	19.32	20.12	19.51	20.48	20.28	19.94	20.04	19.37	19.72	19.48	20.25	21.03	20.83	19.93	19.22	19.57
C21 Hydrocarbon	16.03	14.53	15.77	15.51	15.43	15.64	15.32	15.18	16.03	15.97	15.56	15.28	15.63	14.72		15.42	15.71	15.5	15.28	15.52		15.19	14.88	15.58
Heptadecanoic Acid/Octadecanol	16.65	17.41	17.52	16.85	17.44	17.56	16.89	17.55	17.8	17.61	17.12	17.48	17.5	17.54	17.59	17.48	17.7	17.9	17.25	17.65	17.77	17.45	17.49	17.74
Linoleic Acid	18.49	20.06	19.91	19.92	20.14	20.72	19.59	20.55	20.59	20	19.36	20.71	20.63	20.69	20.85	20.49	20.91	20.61	20.61	20.52	21.3	20.92	20.65	20.56
Oleic Acid	16.92	19.29	18.23	17.86	18.15	18.86	17.5	18.77	19.36	18.4	17.68	19.48	18.6	19.09	18.69	19.02	19.24	18.5	18.5	18.79	19.57	19.39	19.01	18.85
Stearic Acid	22.74	23.01	23.2	22.66	23.06	23.18	22.77	23.17	23.31	23.31	23.09	23.25	23.18	23.21	23.2	23.09	23.43	23.34	22.9	23.18	23.17	23.23	23.33	23.53
Fructose-6-Phosphate	18.16	19.63	21.36	19.79	20.07	19.86	19.6	19.9	20.78	19.84	20.12	19.95	19.82	19.95	20.44	20.33	20.81	21.06	20.3	20.97	21.19	20.05	20.85	21.18
Glucose-6-Phosphate Or Similar	19.95	21.65	23.14	21.48	21.92	21.97	21.82	21.71	22.56	21.61	22.07	22.01	21.67	21.83	22.02	22.08	22.77	22.81	22.19	22.7	23.21	21.93	22.92	23.26
Arachidonic Acid (Also Eicosapentaenoic Acid)	18	20.01	19.87	19.43	20.05	20.84	19.16	20.49	20.54	20.47	19.04	20.88	20.01	20.05	20.27	19.81	20.53	20.32	19.92	20.46	20.76	20.63	20.4	20.36
Beta-Monopalmitin	15.55	16.63	16.56	16.04	16.64	16.64	15.63	17.25	16.8	17.48	16.18	17.06	16.52	16.46	16.92	16.64	16.83	16.99	16.18	16.82	17.26	16.65	17.04	17.03
Docosahexaenoic Acid	15.48	18.73	18.1	17.57	18.33	19.14	17.37	19.77	19.24	19.26	16.8	19.62	18.81	18.77	18.97	17.77	18.86	18.93	18.64	19.31	19.99	19.09	19.21	19.08
Inosine/Adenosine	16.01	15.74	18.86	17.29	17.66	17.7	17.5	18.63	19.08	16.48	16.81	16.45	17.45	18.58	18.07	19.28	19.42	18.63	17.49	18.17	19.09	18.66	18.29	17.71
Alpha-Monopalmitin	20.45	21.18	21.12	20.56	21.1	21.08	20.65	21.17	21.33	21.38	20.78	21.13	21.1	21.05	21.25	21.08	21.17	21.39	20.86	21.3	21.1	21.03	21.05	21.42
Beta-Monostearin	18.41	19.24	19.17	18.63	19.2	19.14	18.32	19.06	19.21	19.36	18.79	19.19	19.02	19.01	19.14	19.08	19.12	19.35	18.75	19.28	19.02	19.03	19.11	19.5
Alpha-Monostearin	23.32	23.87	23.83	23.32	23.84	23.78	23.35	23.71	23.87	23.95	23.57	23.76	23.77	23.82	23.93	23.8	23.85	24.05	23.55	23.82	23.71	23.69	23.7	24.15
Cholesterol	20.97	24.27	22.06	21.68	22.22	22.35	21.24	22.48	22.61	22.28	21.33	22.77	22.78	22.82	22.64	22.29	22.74	22.44	22.21	22.63	22.83	22.33	22.32	22.32

## Sheet: Supp Table 1.2
Sample	Liver Sed 1	Liver Sed 2	Liver Sed 3	Liver Sed 4	Liver Sed 5	Liver Sed 6	Liver Sed 7	Liver Sed 8	Liver Sed 9	Liver Sed 10	Liver Ex 1	Liver Ex 2	Liver Ex 3	Liver Ex 4	Liver Ex 5	Liver Ex 6	Liver Ex 7	Liver Ex 8	Liver Ex 9	Liver Ex 10
Label	A Sedentary	A Sedentary	A Sedentary	A Sedentary	A Sedentary	A Sedentary	A Sedentary	A Sedentary	A Sedentary	A Sedentary	B Exercise	B Exercise	B Exercise	B Exercise	B Exercise	B Exercise	B Exercise	B Exercise	B Exercise	B Exercise
1,5-Anhydroglucitol		17.68	18.45	18.42	17.94	18.74	18.53	18.46	18.19	18.49	18.48	18.41	19.04	18.16	18.05	18.05	19.14	18.92	19.37	18.74
3-Phosphoglyceric Acid	15.68	15.26	14.46	14.54	16.06		14.77	16	15.16	16.75		15.46	14.26	15.68	16.38	15.56	16.92	15.72	16.07	15.28
Adenosine	19.8	20.2	20.22	20.34	20.33		19.72	19.65	19.44	20.47		20.58	20.14	19.78	20.05	19.8	19.86	21.1	21.25	20.93
Adenosine-5-Monophosphate	22.27	20.97	21.91	22.14	22.84		22.17	18.75	18.2	20.39		22.74	22.08	20.78	21.72	21.78		22.5	23.23	22.19
Beta-Alanine	16.22	16.66	16.73	16.33	17.09		18.29	16.39	15.53	16.59		16.66	18.33	17.99	15.68	17.15	16.12	17.35	18.01	16.79
Histidine	19.73	19.42	19.63	20.1	20.34		20.65	19.2	18.23	19.79		20.53	20.07	20.73	19.7	20.08		20.93	21.06	20.05
Inosine	22.37	22.64	23	23.07	22.66		22.71	21.7	21.55	22.5		22.89	22.73	23.22	22.3	22.55	23.01	23.47	23.56	24.29
Maleic Acid	15.51	17.75	16.23	16.3	17.78		16.93	15.41	14.6	14.62		15.83	15.45	15.5		16.86	15.69		13.61	14.34
Myoinositol-2-Phosphate	18.57	17.98	18.63	18.46	19.06		18.84	17.8	17.38	18.17		18.81	18.64	18.75	18.21	18.89	17.27	18.35	18.67	18.77
N-Methylalanine/2-Aminobutanoic Acid/N-Ethylglycine		14.51	13.39	14	13.3	14.52	14.69	13.6	14.38	13.99	13.41	13.86	12.62	13.7	12.55	14.28	14.54	14.45	15.84	12.95
Thymine		17.09	16.56	15.65	16.47	18.84	16.6	18.06	16.52	15.96		16.39	15.67	16.6	15.25	16.33	18.6	16.31	16.3	15.98
Trisaccharide	17.74	16.57		16.38	16.36	17.26	16	16.14	17.21	18.64	17	16.84				16.62	18.06	17.66	17.66	18.01
Uric Acid	19.61	20.33	20.7	20.62	20.77		22.07	20.55	18.36	20.18		20.71	22.39	21.89	20.04	20.36	16.18	21.71	22.15	21.24
Xanthine	18.8	18.72	19.02	19.51	19.21		19.67	18.68	16.77	18.07		19.22	20.38	20.7	18.74	18.94		20.01	20	20.65
2-Aminoadipic Acid	22.82	22.5	22.62	22.82	22.63	22.87	22.96	22.42	22.47	23.04	22.63	22.47	22.5	22.62	22.36	22.3	22.91	22.82	23.21	23.28
2-Deoxyglucose-6-Phosphate	19.8	20.04	19.82	20.32	20.09	19.27	21.24	19.73	19.31	20.88		20.5	20.23	20.26	19.59	19.95	19.11	20.33	20.43	19.77
2-Hydroxybutyric Acid	15.59	16.56	15.77	16.86	16.43	17.47	18.21	15.96	16.22	16.82		17.26	18.07	17.63	14.4	16.55	17.52	18.32	18.42	16.77
4-Hydroxypyridine	13.47	13.49	13.7	13.61	13	13.33	14.08	13.84	13.08	13.91	12.79	13.36	13.78	13.74	13.98	13.8	13.33	13.73	13.75	13.74
6-Methyluracil	14.35	15.09	14.81	13.79	13.93	17.29	14.82	14.38	13.47	14.04	18.93	14.46	13.99	13.91	13.83	14.73	15.23		14.54	14.3
Adenine	18.15	18.37	18.12	18.06	18.17	17.55	18.96	18.28	17.83	18.62		18.63	18.36	18.18	17.63	18.37	18.37	18.75	18.65	18.58
Alanine	22.22	22.03	22.15	22.03	22.25	23.19	22.51	22.79	21.88	22.52	22.88	21.61	22.74	22.23	22.14	21.59	22.69	22.99	23.09	22.44
Aldopentoses	16.84	17.33	17.84	17.86	17.7	17.85	17.35	17.35	17.25	16.89	17.78	17.51	17.96	17.49	17.02	17.75	18.16	17.94	18.27	19.16
Alpha-Tocopherol	19.71	19.25	19.15	19.29	19.26	19.86	19.73	19.16	18.74	19.36	19.3	19.35	19.24	19.34	19.04	19.49	19.65	19.89	20.25	19.5
Arachidonic Acid (Also Eicosapentaenoic Acid)	21.27	22.63	21.89	21.78	21.23	21.66	21.5	21.73	21.38	21.43	20.79	21.95	21.48	21.68	21.48	22.04	22.54	21.58	21.9	21.44
Aspartic Acid	20.75	20.62	20.75	20.65	20.13	21.27	21.38	19.77	20.71	21		20.82	21.05	20.32	20.23	21.42	20.3	22.07	19.89	21.41
Beta-Hydroxybutyric Acid	20.29	20.84	20.5	21.02	20.91	21.9	22.03	21.02	20.68	20.36	20.5	20.89	21.13	20.71	19.99	21.54	22.17	22.03	22.1	22.16
Beta-Sitosterol	21.62	21.55	21.76	21.12	21.33	21.36	21.28	21.13	20.66	21.86	20.49	21.31	21.39	20.81	21.52	20.92	20.69	21.44	21.66	21.58
Campesterol	21.68	21.62	21.83	21.41	21.47	21.71	21.26	21.09	20.92	21.92	21.13	21.48	21.59	21.13	21.66	21.27	21.21	21.5	21.91	21.93
Cholesterol	26.71	26.84	26.74	26.69	26.45	26.86	26.85	26.17	26.37	26.6	26.19	26.65	26.77	26.65	26.3	26.49	26.88	26.51	26.93	26.87
Citric Acid/Isocitric Acid	20.54	20.03	20.53	21.06	20.46	19.45	21.37	20.25	19.95	20.67		20.7	16.66		20.43	21.04	20.01	21.03		20.38
Dehydroalanine (Possibly From Cysteine)	18.27	18.59	18.62	18.25	18.65	17.69	18.48	18.67	17.86	17.64		18.49	18.22	18.52	17.79	18.72	18.19	18.07	18.31	18.63
Dehydroascorbic Acid	22.54	22.58	22.76	22.31	22.72	23.19	23.21	22.83	22.2	23.11	21.64	22.71	22.72	22.76	22.84	22.64	22.67	23.2	23.2	22.95
Docosahexaenoic Acid	17.66	20.4	18.5	18.15	17.51	18.18	18.57	17.96	18.22	18.63		18.9	18	18.09	18.2	18.64	18.58	18.05	18.92	17.69
Ethanolamine	16.27	16.57	16.92	17.05	17.4	15.41	18.95	16.17	16.05	15.76		17.14	18.89	18.27	16.68	18.4	17.23	18.45	19.15	17.59
Fructose Or Similar Ketohexose	14.76	14.47	14.76	14.47	15.64	15.38	14.85	14.63	14.79	15.25	15.2	14.81	15.86	15.48	15.17	15.51	16.97		16.67	17.62
Fructose-6-Phosphate	21.55	21.59	21.58	21.82	21.34	21.1	22.35	21.6	21.82	21.21		21.73	21.3	21.34	21.38	21.06	21.05	22.34	22.24	22.09
Fucosterol	17.65	18.09	16.96	16.7	17.63	17.14	17.6	17	16.24	17.71		17.02	17.61	16.51	18.28		17.13	17.18	17.69	18.02
Fumaric Acid	19.51	19.54	18.94	19	19.2	19.32	19.54	19.05	19.63	19.83		19.55	19.34	18.95	18.62	19.57	20.2	20.26	20.42	19.97
Gamma-Tocopherol	15.63	15.76	15.29	15.08	15.43	16.35	16.35	15.89	15.68	15.65	15.23	15.85	15.4	15.29	15.71	15.87	16.12	15.69	15.97	15.78
Gluconic Acid Or Similar Sugar Acid 1	21.88	22.05	22.28	22.29	22.17	23	22.84	22.63	22.06	21.99	22.39	22.31	22.77	22.9	21.88	22.39	22.32	23.35	23.36	22.57
Gluconic Acid Or Similar Sugar Acid 2	21.84	21.62	22.28	22.29	21.52	23	22.84	22.63	22.02	21.99	21.22	21.58	22.77	22.9	21.88	22.39	22.32	23.35	23.36	22.57
Glucose And Other Aldohexoses	26.62	27.07	26.22	26.94	26.45	26.23	26.21	26.92	26.95	26.85	27.53	26.93	26.21	25.79	26.12	27.21	26.18	26.09	26.14	25.91
Glucose-6-Phosphate	22.63	22.54	22.52	21.82	22.84	21.1	23.15	22.88	21.82	22.07		22.96	22.13	22.74	22.6	22.01	22.32	23.23	23.07	23.31
Glutamic Acid	22.45	21.99	21.61	22.18	21.65	23.01	22.83	20.78	22.11	21.84		23.33	22.25	21.52	20.68	22.32	21.85	23.06	23.19	22.86
Glutamine	23.71	24.24	23.89	24.1	24.24	21.95	24.82	23.52	23.38	24.23		24.7	23.53	24.58	23.85	24.07	23.53	24.73	25.1	24.42
Glycerol	21.95	21.19	21.77	21.11	21.11	22.21	22.44	21.41	21.12	21.87	21.64	21.43	23.68	22.46	20.55	21.64	21.63	22.62	23.42	22.61
Glycerol 1-Phosphate	24.68	25.08	25.49	25.41	25.22	25.83	25.87	24.98	24.99	24.99		25.62	26.23	25.73	24.98	25.72	26.02	26.22	26.28	26.26
Glycine	22.47	22.26	23.01	23.17	23	20.95	24.02	21.92	21.76	22.79	19.19	23.08	23.48	22.97	22.8	23.19	21.7	23.03	23.49	22.43
Glyoxylic Acid	16.68	16.13	16.36	15.21	16.38	15.64	16.73	18.01	14.85	16.84		15.97	16.54	15.49	15.62	16.71	16.8	16.57	16.67	16.66
Heptadecanoic Acid/Octadecanol	18.25	18.7	18.45	18.25	18.11	18.87	18.97	18.4	18.25	18.9	15.95	18.45	18.48	18.29	18.11	18.39	18.44	18.55	18.58	18.6
Hexuronic Acid	21.76	21.66	22.54	21.93	22	21.69	22.44	20.2	21.41	22.32	17.11	22.04	22.41	21.69	21.86	22.11	20.13	22.46	22.45	22.55
Hypotaurine	18.88	19.59	19.98	18.64	20.21	16.45	20.33	19	17.94	20.4		19.86	19.04	18.67	18.73	19.53	17.8	18.8	19.03	18.8
Hypoxanthine	18.62	18.84	19.04	18.91	18.38	17.44	18.31	17.48	18.15	18.67		18.75	18.74	19.06	18.45	18.79	19.23	19.38	19.64	20.15
Isomaltose Or Similar Disaccharide	14.69	14.64	15.1	14.79	14.35	16.09	16.13	16.2	14.94	14.91	16.53	15.36	15.07	14.62	14.09	15.34	16.43	14.79		15.48
Ketopentose-5-Phosphate	17.69	17.13	17.46	17.21	17.54	17.33	16.88	17.24	16.57	17.22		17.84	17.43	17.8	17.17	16.86	17.65	17.72	17.75	18.37
Lactic Acid	25.53	25.37	25.66	25.47	25.6	25.91	25.74	26.76	25.2	25.87	25.15	25.04	26.45	26.36	25.4	24.87	26.57	26.3	26.41	26.11
Lauric Acid	14.82	14.17	13.77	13.7	13.7	14.65	14.45	14.22	14.99	15.11		14.63	13.65	13.47	13.5	14.01	14.47	15.75	14.75	14.85
Leucine	19.32	19.28	19.32	19.52	19.66	20.3	20.89	19.91	19.5	19.48		20.04	20.98	20.1	18.98	19.73	20.53	20.81	20.82	20.03
Linoleic Acid	18.51	19.72	19.25	19.76	18.98	19.61	18.42	19.3	18.65	18.87	20.16	19.6	19.14	19.6	19.94	19.66	20.42	20.06	20.06	19.02
Lysine	21.39	20.8	21.06	21.63	22.34	18.79	22.24	19.99	19.51	21.58		21.67	21.89	22.32	20.96	21.47	20.08	22.59	23.02	21.16
Malic Acid	22.45	22.49	22.17	22.5	22.82	23.55	22.71	22.01	22.55	22.57		22.76	22.31	22.29	21.99	22.78	22.79	23.43	23.28	22.76
Maltose Or Similar Disaccharide	20.46	19.27	19.54	19.81	20.36	20.57	18.16	19.4	18.98	20.19	20.57	19.64	19.04	19.39	19.64	19.05	20.76	21.36	21.3	21.04
Myoinositol	24.18	23.94	24.4	23.96	23.68	24.64	24.69	24.01	23.87	24.27	23.64	24.15	24.15	24.1	23.6	24.41	24.68	24.3	24.55	24.65
O-Methylphosphate	18.07	17.77	18.08	17.36	17.24	16.97	18.29	17.24	17.09	17.61		18.46	18.01	17.68	17.58	17.69	17.76	17.56	18.4	18.05
O-Phosphocolamine	19.49	19.79	20.6	20.27	20.19	16.91	21.16	17.97	18.08	18.77		20.12	20.26	20.44	19.94	21.3	19.46	20.38	20.88	21.37
Oleic Acid	17.34	18.44	18	17.89	17.64	18.1	17.78	17.76	17.64	17.91	17.81	18.37	17.08	18.04	17.33	18.19	17.6	17.84	17.03	17.55
Ornithine	17.72	17.71	18.26	16.17	18.06	17.41	18.71	18.08	17.36	17.23		17.74	18.16	18.04	16.69	18.1	17.79	17.07	17.54	16.58
Palmitic Acid	23.77	24	24.14	23.89	23.91	23.84	24.26	23.96	23.64	24.21	22.71	24.04	23.94	23.59	23.69	24.06	23.88	23.85	24.11	23.95
Pentonic Acids	15.01	14.64	14.43	13.76	14.97	15.29	15.78	15.12	13.9	15.9		15.42	13.91	15.41	14.3	15.06	15.45	15.15	15.64	14.79
Phenylalanine	17.65	18.37	18.21	18.25	18.8	18.9	19.74	18.93	18.22	18.57		19.03	19.61	19.1	17.53	18.18	19.16	19.44	19.5	19.06
Phosphoric Acid	26.77	26.58	26.58	26.34	26.39	26.39	26.81	26.25	26.32	26.76		26.55	26.72	26.45	26.39	26.64	26.68	26.58	26.96	26.91
Proline	19.43	18.7	19.16	18.82	19.63	20.15	20.22	20.13	19.13	19.83		19.77	20.58	19.5	18.72	18.89	20.1	20.17	20.18	19.8
Serine	20.09	20.05	19.72	19.52	20.26	20.89	20.97	20.75	20.11	21.32		20.28	20.68	19.94	19.16	19.74	20.83	20.47	20.75	20.23
Siloxanes	18	17.98	17.83	17.88	17.77	17.83	18.26	17.62	17.63	18.75	17.81	17.62	17.67	17.33	17.53	17.75	18.12	17.96	18.4	18.35
Spermidine	21.04	20.72	20.78	20.81	19.92	18.34	21.71	20.58	20.08	21.61	17.8	21.39	21.15	21.22	20.53	20.81	19.94	21.9	22.45	21.67
Succinic Acid	22.25	22.44	22.5	22.58	22.21	22.58	23.25	22.69	21.91	21.67		22.35	23.66	22.99	21.98	22.16	22.98	23.57	23.87	22.91
Tartaric Acid	18.08	16.55	17.41	15.94	15.58	17.21	16.7	16.44	16.47	16.38		16.51	16.36	17.17	17.53	17.91	18.14	17.07	16.08	17.96
Threonine	19.64	19.84	19.35	19.08	20	20.9	20.78	20.4	20.09	20.25		20.01	20.55	19.8	18.78	19.47	20.72	20.45	20.55	20.05
Tris	16.89	14.46	15.72	13.96	16.43	15.28	14.37	19.61	15.85	14.63	17.69	16.42	15.49	13.46	13.19	14.25	15.47	13.93	16.03	15.49
Tyrosine	18.01	18.23	18.09	18.42	18.94	17.25	20.1	18.25	17.83	18.35		19.11	19.6	19.35	17.63	18.66	18.28	19.86	19.98	18.87
Urea	23.49	23.26	23.87	23.55	23.67	24.31	24.17	24.48	23.11	23.94	23.3	23.94	23.83	23.61	23.68	23.75	24.13	24.26	24.41	24.14
Valine	17.96	19.55	19.64	19.95	19.65	20.2	20.57	20.16	19.77	19.95		20.26	19.33	20.08	19.35	20.06	20.12	19.17	20.74	18.74

## Sheet: Supp Table 1.3
Sample	Soleus Sed 1	Soleus Sed 2	Soleus Sed 3	Soleus Sed 4	Soleus Sed 6	Soleus Sed 7	Soleus Sed 8	Soleus Sed 9	Solues Sed 5	Soleus Sed 10	Soleus Sed 11	Soleus Sed 12	Soleus Exercise 1	Soleus Exercise 2	Soleus Exercise 3	Soleus Exercise 4	Soleus Exercise 5	Soleus Exercise 6	Soleus Exercise 7	Soleus Exercise 8	Soleus Exercise 9	Soleus Exercise 10	Soleus Exercise 11	Soleus Exercise 12	Soleus Exercise 13
Label	A Sedentary	A Sedentary	A Sedentary	A Sedentary	A Sedentary	A Sedentary	A Sedentary	A Sedentary	A Sedentary	A Sedentary	A Sedentary	A Sedentary	B Exercise	B Exercise	B Exercise	B Exercise	B Exercise	B Exercise	B Exercise	B Exercise	B Exercise	B Exercise	B Exercise	B Exercise	B Exercise
Cellobiose Or Similar Disaccharide	15.16	15.93		16.85	16.08	15.85	16.37	15.77	15.17	16.25	16.65		15.63	16	14.02		16.38		16.3	15.77	13.74		17.22	17.02	15.93
Pyruvic Acid	15.39	15.51		15.8	14.9	15.86	15	15.19	14.57		14.88		15.09	15.23	14.18	14.01	14.28	14.1	14.16	15.07			14.63	15.38	15.95
Campesterol	14.85	16.7		16.61	17.32	18.29		16.86	17.19	17.77	17.09		15.8		16.09	15.54	15.31		16.64	16.36	16.8	14.4	17.64	13.24	16.21
O-Methylphosphate		15.48		15.61	14.51	16.29	16.87	16.82	14.93	15.46	14.23		13.09	16.47	16.58	16.01	15.16	15.69	16.88	16.7	15.2		17.64	16.23	16.6
Hydroxyprolines	15.91			15.47	14.15	14.99	15.56	15.83	15.92	16.47	16.11		14.83	15.26		15.84	15.21	15.03	15.75	15.43	14.94	14.37	16.65	15.69	15.84
Inosine 5'-Monophosphate	20.44	20.73		20.3	20.82	21.56	20.39	20.72	20.3		21.58		20.94	21.38	21.66	20.89	21.34	20.99	20.63	21.47	17.27		22.04	21.14	20.16
Phenylalanine	15.84	15.5		16.31	15.96	16.19	16.26	16.29	15.9	16.42	15.67		15.11	15.7	15.34	16.02	15.26	15.6	16.12	15.14	14.91		16.6	15.75	15.92
Glutathione (Reduced)		16.75	11.44	17.17	17.58	17.47	16.61	16.59	17.39	17.53	17.57		10.41	13.33	16.6	15.57	15.73	16.94	15.48	15.34	12.57		16.23	15.48	16.38
Myoinositol-2-Phosphate		15.33	13.17	15.34	15.81	15.17	15.52	14.84	15.9	16.02	15.47		14.24	14.71	15.09	15.06	15.27	15.39	15.55	15.12	15.24		15.71	15.59	15.73
Arachidic Acid/ 1-Heneicosanol	14.48	14.88		14.4	15.3	14.05	14.27	13.46	14.05	15.07	14.04		13.51	14.32	14.51	15.25	13.54	14.54	14.26	13.92	13.86		13.33	15.03	15
Squalene	13.68	14.15		15.41	14.51	16.01	15.68	15.19	14.38	15.72	15.99		14.8	15.7	15.71	16.16	15.75	15.77	15.97	16.22	13.88		17.02	16.52	16.2
Lactic Acid	24.36	23.73	23.11	24.02	23.17	24.29	23.04	23.1	22.96	21.66	24.08		24.95	24.29	24.38	23.7	24.32	23.61	22.43	24.14	22.54		24.33	23.41	23.25
C12 Hydrocarbon	13.66	13.88	13.63	13.61	13.65	13.92	13.23	13.79	13.43	13.2	13.86		13.69	13.04	13.7	13.44	13.52	13.08	13.82	13.74	14.2		13.93	14	13.61
Ethanolamine	17.64	18.51	16.99	18.98	19.44	19.51	19.17	19.51	18.72	18.87	19.48		17.62	17.96	18.28	19.13	18.61	19.05	19.08	19.03	18.69		19.31	19.23	18.8
Proline	16.11	14.48	13.49	14.96	13.49	14.53	15.25	15.02	15.02	15.73	15.01			14.06	14.45	15.06	14.68	14.24	15.4	14.03	14.98		13.59	13.7	16.43
Succinic Acid	18.38	18.03	17.49	17.87	18.55	18.06	17.54	18.1	18.08	17.93	17.97		18.11	18.65	18.22	18.21	18.62	17.82	18.81	17.46	17.72		19.13	18.47	18.01
Hexadecanol/Pentadecanoic Acid	15.09	15.14	13.75	14.89	15.61	14.96	15.05	14.9	14.52	15.28	14.11		14.98	14.76	15.03	15.58	15.09	15.41	14.94	15.13	14.63		14.99	15.61	14.54
Beta-Monopalmitin	16.39	16.33	14.92	16.24	16.74	16.86	16.8	16.71	16.13	17.1	16.57	13.5	16.07	16.35	16.54	16.49	16.37	16.57	16.28	16.57	16.13		16.83	16.9	16.91
Beta-Sitosterol	12.45	15.49		15.4	16.47	17.76	16.35		14.81	17.16	11.19		15.26	12.74	14.84	14.53	11.83	15.28	15.77	15.78	15.87	13.92	17.3	15.53	15.3
Alpha-Tocopherol		14.98		14.91	15.26	16.25	15.83	15.6	15.35	16.18	15.82	12.3	13.55	15	14.46	14.85	14.07	15.35	15.77	16.03	16.52	12.72	16.58	15.86	15.55
Mstfa Artifact	16.2	16.56	16.67	16.72	16.76	16.83	16.76	16.81	16.86	17.17	17.06		16.31	16.25	16.44	16.69	17.07	16.78	16.67	16.66	16.93	15.27	17.23	17.02	17.21
Beta-Alanine Or 3-Aminoisobutyric Acid	13	12.61	13.43	14.35	13.59	15.19	15.39	15.82	14.7	15.97	15.38		12.88	13.21	13.8	13.3	13.42	13.4	14.47	14.79	14.72	13.17	15.46	15.25	15.47
2-Aminoadipic Acid	19.22	19.92	13.36	20.17	20.21	20.11	20.15	20.13	19.99	20.3	20.3		19.8	20.05	19.87	19.81	19.45	19.94	20.1	20.2	19.79	15.98	19.99	19.71	18.38
Citric Acid/Isocitric Acid	16.36	15.14		16.63	16.95	16.35	16.92	16.06	16.16	18.82	16.13	14.09	14.48	15.78	14.8	16.36	16.06	16.5	16.63	16.17	17.16	14.75	17.66	17	17.22
Fructose-6-Phosphate	18.36	17.21	16.2	16.4	14.46	18.07	16.16	16.82	16.16	17.71	18.23		19.22	18.33	19.28	17.25	17.84	16.84	15.81	18.36	14.43	13.5	18.71	16.99	16.19
Inosine/Adenosine	18.79	18.45	15.85	19.11	18.05	18.12	18	18.69	18.08	17.14	18.64		20.98	18.45	19.39	17.86	18.8	18.66	16.7	18.97	18.08	14.64	19.75	17.67	17.81
Adenosine-5'-Monophosphate	17.1	18.77		19.17	19.45	19.38	19.44	18.86	19.85	20.41	18.86	12.17	16.19	19.15	18.22	19.76	18.53	19.84	20.06	18.36	17.69	9.44	20.33	19.39	20.35
C10 Hydrocarbon	14.02	14.02	14.08	14.13	14.37	14.28	13.93	14.24	14.64	14.22	14.61	12.68	14.31	13.95	14.67	14.28	14.26	14.27	13.79	12.75	14.47	13.6	15.09	14.05	15.23
Decamethyltetrasiloxane	14.4	14.35	14.35	14.81	14.52	14.72	14.64	14.49	14.6	12.7	14.52	12.99	13.73	14.65	14.56	14.81	14.63	14.66	14.33	14.4	14.02	13.51	14.88	14.81	14.48
2-Hydroxypyridine	15.88	16.11	15.6	16.17	16.15	16.5	16.23	16.14	16.19	16.2	16.25	14.33	16.04	16.09	16.09	16.36	16.15	16.24	16.2	16.22	15.83	15.12	16.46	16.21	16.19
Alanine	20.65	20.3	19.27	20.45	20.11	20.95	19.97	20.2	20.43	20.07	20.71	16.93	19.71	20.33	20.37	20.76	20.41	20.12	19.88	20.2	19.51	18.01	20.5	19.85	20.27
2-Hydroxybutyric Acid	20.96	20.87	20.89	21.08	21.11	20.92	20.86	21	20.98	20.99	21.26	17.88	21.21	20.98	20.68	21	20.73	20.97	21.05	21.29	21.21	17.9	21.02	21.14	21.09
Dodecamethylpentasiloxane	18.21	16.89	16.37	16.55	17.29	17.17	16.7	16.6	17.51	16.59	17.04	15.37	17.27	17.1	16.74	16.71	17.09	16.97	16.2	16.78	16.68	14.48	17.12	17.34	17.15
Valine	17.48	16.35	15.18	16.75	17.07	17.64	18.41	18.4	16.92	18.21	17.37	12.65	16.16	16.52	15.99	17.04	15.23	16.51	18.25	16.74	18.25	12.28	18.17	17.36	18.34
Urea	23.44	22.67	21.67	23.14	23.09	22.33	22.86	22.93	22.96	23.07	22.65	18.77	22.29	23	22.78	22.97	22.87	23.13	23.58	21.79	22.6	19.64	23.14	22.26	23.17
Benzoic Acid	17.01	16.97	17.03	17.1	16.93	16.66	17.25	17.21	16.7	17.24	16.97	15.11	17.31	16.65	16.9	17.04	17.07	17.01	16.91	17.15	17.2	14.54	16.98	16.9	17.16
Phosphoric Acid	25.65	25.61	24.26	25.89	25.85	26.11	25.62	25.73	25.72	25.58	25.98	23.62	25.28	25.69	25.55	25.74	25.46	25.65	25.92	25.48	24.69	23.94	26.03	25.99	25.72
C13 Hydrocarbon	16.03	16.31	16.18	16.17	16.31	16.04	16.28	16.34	16.18	16.1	16.43	13.68	16.23	16.34	16.13	16.02	16.27	16.59	16	16.43	16.43	13.83	16.37	16.43	16.43
Glycine	20.85	21.16	20.55	21.38	20.66	21.01	20.68	20.89	21.48	21.49	21.14	18.76	19.91	20.5	20.34	20.52	19.7	20.32	20.53	20.66	20.36	19.07	20.93	20.45	20.63
Fumaric Acid	18.29	18.5	16.7	18.04	17.95	18.77	17.67	18.15	17.52	17.09	18.24	14.63	18.05	18.37	18.04	18.09	18.46	17.71	17.39	18.09	17.26	16.22	18.85	17.91	18.3
Serine	21.1	20.74	19.62	21.66	20.95	21.21	20.76	20.84	21.51	21.71	21.56	18.15	19.3	20.45	20.66	21.27	19.98	20.28	21.2	20.29	19.24	18.54	21.24	20.54	21.15
Threonine	19.76	18.57	17.64	19.75	18.81	19.84	19.77	19.74	19.45	20.61	19.55	16.73	18.01	18.87	18.98	19.21	17.86	18.57	20.1	19.38	18.68	16.64	19.83	19.73	20.41
Aspartic Acid	18.7	17.65	17.34	17.34	18.95	18.54	18.85	18.56	18.53	19.37	18.68	17.82		17.88	17.29	18.1	18.19	18.12	18.7	17.81	18.15	16.63	17.57	18.62	18.91
Malic Acid	21.41	21.15	20.01	20.93	20.93	21.61	20.44	20.89	20.43	20.34	20.98	17.73	20.91	21.09	21.01	20.88	21.38	20.73	20.4	20.83	20.18	19.46	21.51	20.62	21.14
C15 Hydrocarbon	16.37	16.68	16.74	16.42	16.92	16.67	16.95	16.36	16.51	16.65	16.7	14.59	16.51	16.31	16.59	16.33	16.76	17.02	16.37	16.54	16.62	13.91	16.57	16.37	16.46
Glutamic Acid	23.38	23.22	22.65	23.62	23.69	23.74	23.43	23.35	23.24	23.83	23.72	20.82	22.83	23.49	23.29	23.47	23.02	23.19	23.73	22.71	22.34	21.1	23.59	23.72	23.09
Creatinine	23.15	22.94	22.71	23.23	22.91	23.41	22.88	22.98	22.96	23.1	23.12	20.91	22.77	23.1	22.8	22.81	22.81	22.91	23.09	22.7	22.05	21.24	23.09	23.09	22.66
Hypotaurine	18.68	18.73	18.34	19.45	19.33	20.25	20	20.2	19.66	20.69	19.76	18.12	17.75	19.03	18.67	19.15	18.56	19.21	19.98	19.35	19.13	18.62	20.28	19.75	19.82
Pyrophosphate	16.85	17.96	11.92	17.79	17.87	16.48	17.39	16.47	17.89	20.83	16.63	15.21	15.76	18.02	16.2	18.53	16.54	17.84	18.41	15.85	17.06	14.84	16.62	17.89	18.09
Taurine	22.01	21.53	21.92	22.95	21.63	23.47	22.62	23	22.73	23.37	22.76	16.81	21.08	22.49	22.53	22.62	22.17	22.54	22.74	22.7	21.64	18.75	23.61	23.16	23.16
Glycerol 1-Phosphate	21.11	20.94	19.69	21.11	20.45	21.45	20.44	20.64	20.49	20.47	21.22	18.34	21.66	21.1	21.52	20.85	21.44	20.85	20.2	21.08	19.45	19.63	21.68	21.27	20.66
O-Phosphocolamine	17.12	17.29	16.64	17.78	18.26	18.72	18.27	18.48	18.1	18.74	18.29	16.28	17.28	17.69	17.86	18.27	18.11	18.21	18.68	18.4	18.9	16.75	19.08	19	18.74
Deuterated Myristic Acid (Rtl Std)	22.26	22.13	20.02	22.22	22.26	22.38	22.15	22.19	22.04	22.41	22.36	20.29	22.26	22.14	22.19	22.18	22.4	22.11	22.24	22.19	22.22	20.4	22.22	22.56	22.18
Dehydroascorbic Acid	17.47	17.5	16.56	17.73	17.81	18.37	17.62	17.99	17.87	18.09	17.61	15.62	17.05	17.41	17.25	17.24	16.53	17.62	17.49	16.75	17.66	19.82	17.94	18.47	17.44
Myristic Acid Or Pentadecanol	18.69	18.8	17.97	18.69	19.22	18.48	18.4	18.31	18.23	18.77	18.65	16.85	18.51	18.53	18.64	18.54	18.41	18.5	18.53	18.58	18.54	16.31	18.9	18.79	18.61
Lysine	16.5	15.49	16.15	16.15	15.34	17.52	16.94	17.24	17.32	19.27	16.4	15.43	15.86	15.92	15.41	16.83	16.44	15.97	17.18	17.14	17.8	15.91	17.1	16.88	17.34
Glucose And Other Aldohexoses	19.68	20.31	18.61	20.17	20.57	20.47	19.32	18.98	19.65	21.56	20.08	19.31	21.19	19.7	20.49	19.66	19.27	19.82	19.8	20.04	21.1	17.52	20.98	20.29	19.74
C19 Hydrocarbon	15	15.16	15.31	15.75	16.32	14.79	15.22	16.18	14.62	15.76	15.16	13.24	15.88	15.48	14.59	15.48	15.71	15.64	15.22	15.41	15.79	13.5	15.45	16.41	14.6
Pantothenic Acid	17.48	17.77	16.9	17.32	17.94	17.87	16.69	16.73	17.43	17.65	17.69	14.2	17.37	17.62	17.47	17.48	17.56	17.87	16.79	16.14	16.48	14.86	17.87	17.26	17.02
Palmitic Acid	22.23	22.47	21.26	22.24	22.8	22.62	22.47	22.34	22.22	22.48	22.47	20.67	22.19	22.31	22.29	22.48	22.05	22.4	22.39	22.3	22.27	20.52	22.81	22.74	22.5
Myoinositol	19.96	21.32	19.62	20.7	21.11	21.21	20.04	20.72	21.65	20.6	20.47	18.52	20.28	20.07	20.35	20.09	20.13	20.66	20.32	20.62	20.56	18.53	20.86	21.65	19.86
Heptadecanoic Acid/Octadecanol	17.01	17.34	15.76	17.19	17.66	17.33	17.26	16.94	17.14	17.45	17.14	14.74	17.01	17.1	17.32	17.45	16.83	17.43	17.19	17.25	16.6	14.18	17.7	17.62	17.21
Linoleic Acid	21.14	20.92	19.17	21.38	21.37	21.34	20.96	20.98	20.74	20.94	21.27	19.21	21.18	20.94	20.99	21.17	20.87	21.14	21.19	21.22	20.75	19.45	21.47	21.18	21.11
Oleic Acid	19.49	18.93	17.16	19.46	19.87	19.67	19.52	19.67	18.86	19.07	19.56	17.61	19.41	18.85	18.81	19.17	18.49	19.12	19.11	19.65	19.5	17.19	19.55	19.18	19.03
Stearic Acid	22.89	23.18	22.13	23.11	23.46	23.23	23.16	22.9	23	23.34	23.23	21.17	22.91	23.22	23.31	23.27	22.99	23.27	23.25	23.03	22.83	21.27	23.63	23.58	23.43
Glucose-6-Phosphate Or Similar	20.3	19.65	18.74	18.66	18.23	20.69	18.83	19.27	18.27	17.41	20.47	15.8	21.07	20.79	21.45	19.8	20	19.82	17.59	20.74	17.25	16.85	21.02	19.56	19.15
Arachidonic Acid (Also Eicosapentaenoic Acid)	19.93	20.2	18.15	20.64	20.76	20.9	20.44	20.57	20.29	20.39	20.7	18.23	19.93	20.17	20.12	20.56	19.63	20.33	20.33	20.29	19.43	18.33	21.01	20.27	20.13
Docosahexaenoic Acid	18.59	18.87	16.48	19.45	19.24	19.73	19.44	19.19	18.65	18.97	19.05	16.32	18.65	19.01	19.11	19.67	18.52	19.35	19.18	19.33	17.35	16.97	19.68	19.52	19.02
Alpha-Monopalmitin	20.82	21.08	20.12	20.97	21.3	21	21.18	20.97	21.03	21.18	21.15	19.07	20.87	21.06	21.17	21.04	21.1	21.17	21.09	21.13	20.94	18.89	21.48	21.51	21.64
Beta-Monostearin	18.68	19.1	17.96	18.91	19.39	19.02	19.24	19.02	18.99	19.18	19.11	16.82	18.69	19.05	19.11	19.12	19.09	19.14	19.01	19.08	18.95	16.46	19.43	19.53	19.56
Alpha-Monostearin	23.42	23.81	22.98	23.68	24.09	23.67	23.92	23.71	23.78	23.9	23.83	21.82	23.59	23.84	23.84	23.83	23.75	23.92	23.81	23.85	23.77	21.66	24.11	24.3	24.43
Cholesterol	22.39	22.79	20.82	23.1	23.17	23.3	23.06	23	23.1	23.01	23.09	20.66	22.6	22.81	22.82	22.96	22.41	23.04	22.88	22.9	22.94	20.86	23.34	22.9	22.8

## Sheet: Supp Table 1.4
Sample	Serum Sed 1	Serum Sed 2	Serum Sed 3	Serum Sed 4	Serum Sed 5	Serum Sed 6	Serum Sed 7	Serum Sed 8	Serum Sed 9	Serum Sed 10	Serum Ex 1	Serum Ex 2	Serum Ex 3	Serum Ex 4	Serum Ex 5	Serum Ex 6	Serum Ex 7	Serum Ex 8	Serum Ex 9	Serum Ex 10
Label	A Sedentary	A Sedentary	A Sedentary	A Sedentary	A Sedentary	A Sedentary	A Sedentary	A Sedentary	A Sedentary	A Sedentary	B Exercise	B Exercise	B Exercise	B Exercise	B Exercise	B Exercise	B Exercise	B Exercise	B Exercise	B Exercise
Palmitoleic Acid	14.49		13.21	16.28	15.98	16.25		15.89	16.49	16.64	15.47	16.43	14.74	13.37	18.96	14.55		15.13		14.48
Benzoic Acid	17	17.21	14.22	17.02	13.62		16.98	16.95	16.98		16.81	16.83	16.84	16.99	16.99	17.72	16.94	16.77		16.82
Gluconic Acid Or Similar Sugar Acid	16.6		14.19		14.31	14.61	16.08	15.93	16.41	13.99	14.63	15.28		16.01	16.32	15.18	15.75	16.7	13.79	15.61
Histidine	17.71		15.67	17.65	15.68	16.47	17.97	18.11	17.34		17.6	17.87		17.6	18.37	17.26	16.67	17.44	13.67	17.74
Citric Acid/Isocitric Acid	19.12	18.83	16.96	19.36		17.62	19.77	19.91	19.04	17.52	19.94	19.41	18.62	19.35	20.7	19.62	18.92	19.86		18.78
Sucrose And Similar Disaccharides	15.46	15.02	13.36	13.2	14.1	12.38	14.44	14.37	14.68		14.32	15.3	13.4		13.01	14.43	14.25	15.15	13.86	15.1
Beta-Sitosterol	18.89	18.61	17.66	19.12	18.15	18.79	17.74	19.95	19.38	18.73		18.08	18.35	18.26	19.19	18.53	19.38	18.89	18.55	18.67
Methionine	17.18	16.81	14.46	16.8	16.09	14.86	17.1	17.09	16.89	15.9	16.5		17.09	16.7	16.77	16.83	16.52	16.69	14.87	16.6
Serotonin	15.82	16.18	15.88	16.06	17.37	17.45	15.99	16.58	15.81	16.62	16.25	16.28	16.34	16.14	16.96		15.23	16.8	16.72	15.99
Threonic Acid	18	18.04	17.17	18.12	17.39	17.43	18.58	18.47	18.66	17.35	18.46	18.69		18.05	18.88	18.28	18.71	18.24	17.27	18.14
Leucine	19.63			19.4	18.93	19.56	19.31	20.7	20.37	19.58	18.34	18.8	20.14	19.91	19.26	18.53	19.8	18.84	18.32	18.91
Uric Acid	16.49	20.02	12.86	16.65		15.44	17.07	16.97	17.59		17.27	17.3	16.66	17.91	17.89	16.35	17.02	16.71	14.33	17.01
1,5-Anhydroglucitol	20.72	19.65		20.49	19.78	19.75	20.91	20.42	20.55	18.75	20.8	21.03	19.88	20.79	21.18	20.65	20.8	20.43	19.05	20.98
Alanine	19.28	18.77	18.58	19.4	19.57	19.74	18.8	19.02	19.58		19.17	19.21	19.68	19.45	18.93	19.07	19.12	18.88	20.3	18.55
Asparagine	17.66	16.98	14.7	16.46	16.29	15.67	16.44	17.38	16.63		17.03	17.03	16.66	16.66	17.29	16.81	16.03	16.88	14.84	16.99
Heptadecanoic Acid/Octadecanol	15.31	13.23		14.89	15.29	14.3	15.3	15.5	15.32	14.93	14.72	14.83	13.94	15.01	15.92	14.74	15.05	15.4	16.06	15.24
Serine	20.18	20.71	17.83	20.1	19.55		19.97	20.22	20.2	18.39	19.59	19.77	19.18	20.39	19.89	19.72	20.36	19.57	19.1	19.81
Aldopentoses	17.77	18.25	17.17	17.54	15.96	16.12	18.22	18.18	18.47	18.01	18.39	19.01	16.81	17.93	19.36	16.17	18.12	18.73	16.49	18.38
Alpha-Tocopherol	17.74	18.49	17.6	18.35	18.14	18.22	17.77	18.72	18.34	18.35	17.57	17.79	17.7	18.13	17.94	17.45	18.32	18.15	17.86	17.62
Arachidonic Acid (Also Eicosapentaenoic Acid)	18.02	18.56	18.78	19.24	19.65	19.83	19.02	19.79	19.11	19.81	18.62	18.89	17.73	18.87	19.81	18.58	18.13	19.3	18.6	18.58
Campesterol	18.69	18.9	17.93	19.05	18.01	18.85	18.83	19.91	19.33	18.63	17.74	18.14	18.65	18.37	18.87	18.33	19.26	18.89	18.24	18.66
Cholesterol	22.99	23.1	22.69	23.47	23.04	23.17	23.3	24	23.42	23.47	23.06	23.25	22.76	23.29	23.49	23.04	23.36	23.69	22.62	23.22
Gamma-Tocopherol	14.46	14.63	13.94	14.49	13.04	14.85	13.48	15.39	14.63	15.09	13.99	13.94	14.58	14	12.49	13.44	15.13	14.51	14.22	13.65
Glucose And Other Aldohexoses	27.06	27.24	25.67	27.06	26.3	26.35	26.43	25.54	25.37	26.29	26.49	26.99	24.9	25.52	26.97	25.36	27.18	27	26	26.94
Glutamic Acid	18.36	17.96	16.77	18.17	17.12	17.11	18.45	18.63	18.53	16.82	18.24	18.31	18	18.08	18.63	17.58	17.76	18.48	14.63	18.12
Glutamine	21.35	20.32	19.01	20.96	20.04	19.37	20.77	21.16	21.01	18.05	20.76	20.97	20.2	20.45	21.09	20.47	20.36	20.78	18.71	21.06
Glycerol	20.09	23.2	19.23	20.37	18.93	19.56	20.31	20.7	20.1	19.58	20.37	20.55	20.14	19.91	21.06	20.77	19.8	20.3	18.32	19.87
Glycerol 1-Phosphate	19.4	19.81	18.15	19.81	17.93	19.15	18.76	20.43	19.01	19.49	17.86	18.39	18.79	18.96	18.4	18.15	19.48	19.54	19	19.14
Glycine	18.92	20.44	19.94	19.53	19.51	19.02	20.08	20.17	20.05	19.06	19.65	20.18	20.01	20.44	20.41	20.23	20.52	20.04	19.05	20.21
Hydroxyprolines	16.62	16.88	15.94	16.29	16.36	15.53	16.87	17	17.14	15.48	16.7	16.99	16.35	17.54	17.17	16.96	16.7	16.46	15.54	16.88
Isoleucine/Leucine	18.32	18.03	16.76	18.32	17.61	16.97	17.92	18.6	18.5	16.91	17.86	18.15	18.47	18.35	18.8	17.99	18.02	17.81	16.78	17.69
Lactic Acid	23.48	23.99	24.17	23.29	23.91	24.53	23.66	23.85	23.96	23.68	23.75	23.52	23.86	23.65	24.02	22.96	23.46	23.58	23.76	23.46
Linoleic Acid	20.08	19.02	19.29	20.59	20.69	20.18	20.76	19.89	20.1	20.42	20.55	21.26	19.33	20.48	21.66	21.78	20.63	20.44	19.89	20.31
Lysine	20.05	20.2	20.16	20.26	20.88	20.81	20.45	20.95	20.09	19.75	20.46	20.68	19.71	21.07	20.68	20.48	20	20.32	20.53	20.63
Methyl Eicosatrienoate	17.85	19.29	17.59	19.18	17.28	18.27	17.55	19.13	17.93	18.5	17.1	17.78	17.85	18.01	17.25	16.98	18.64	18.23	17.58	17.56
Methyl Linoleate	18.02	19.02	16.98	18.35	16.92	17.48	17.06	18.81	17.74	17.92	16.81	17.4	18.04	18.09	16.6	17.21	19.18	18.14	17.99	17.35
Methyl Palmitate	18.57	19.07	17.69	19.08	17.5	18.08	17.83	19.4	18.42	18.4	17.3	18.04	18.56	18.56	17.93	17.84	19.35	18.72	18.27	18.02
Methyl Stearate	18.52	19.87	18.06	19.38	17.89	18.65	17.93	19.59	18.63	18.92	17.76	18.26	18.65	18.61	17.67	17.68	19.2	18.83	18.33	18.05
Myoinositol	20.26	20.02	18.98	19.82	19.6	19.96	20.24	20.5	20.12	19.76	20.4	20.06	19.18	20.13	20.77	19.76	20.11	20.19	19.26	20.26
Oleic Acid	17.6	19.02	18.13	19.36	19.77	19.09	18.83	18.4	18.86	19.39	19.39	19.92	19.33	18.42	18.12	20.04	18.54	18.73	17.8	18.82
Palmitic Acid	20.53	20.15	20.06	20.99	20.99	20.87	20.98	21.03	21.03	20.93	21.09	21.49	20.25	20.81	22.14	21.21	21.06	21.03	20.02	21.07
Phenylalanine	18.84	18.34	16.92	18.41	18.13	17.22	18.74	18.74	18.44	17.14	18.42	18.53	18.21	18.34	19.04	18.35	18.2	18.29	16.84	18.87
Phosphoric Acid	21.22	21.05	19.23	20.29	19	19.96	20.97	21.17	20.68	19.63	21.63	21.29	20.76	21.57	21.1	20.5	20.18	21.48	18.1	20.75
Proline	20.1	19.66	18.49	19.98	18.14	17.86	19.03	19.31	19.82	17.47	19.66	19.69	19.94	19.39	18.71	19.71	19.3	19.55	18.15	18.6
Threonine	19.98	19.13	19.52	20.47	19.59	19.69	19.9	20.43	20.27	19.67	19.89	20.29	19.21	20.11	20.35	19.98	20.17	19.85	19.43	19.66
Tyrosine	19.68	19.17	17.78	19.5	18.45	18.26	19.51	19.8	19.17	18.35	18.84	19.19	18.23	19.36	19.73	18.92	18.67	19.13	17.93	19.2
Urea	22.18	23.05	20.65	22.07	22.43	22.18	23.09	22.75	22.15	22.03	22.9	23.16	22.86	22.71	19.3	21.51	23.19	22.88	21.98	21.88
Valine	19.25	19.38	18.31	19.04	18.92	18.25	18.94	19.31	19.03	18.47	18.45	19.05	18.98	19.07	19.4	17.72	19.26	18.5	18.23	18.45

## Sheet: Supp Table 1.5
Sample	Heart Sedentary 1	Heart Sedentary 2	Heart Sedentary 3	Heart Sedentary 4	Heart Sedentary 5	Heart Sedentary 6	Heart Sedentary 7	Heart Sedentary 8	Heart Sedentary 9	Heart Sedentary 10	Heart Exercise 1	Heart Exercise 2	Heart Exercise 3	Heart Exercise 4	Heart Exercise 5	Heart Exercise 6	Heart Exercise 7	Heart Exercise 8	Heart Exercise 9	Heart Exercise 10
Label	A Sedentary	A Sedentary	A Sedentary	A Sedentary	A Sedentary	A Sedentary	A Sedentary	A Sedentary	A Sedentary	A Sedentary	B Exercise	B Exercise	B Exercise	B Exercise	B Exercise	B Exercise	B Exercise	B Exercise	B Exercise	B Exercise
2-Aminoadipic acid	19.37	17.97	18.8	19.56	19.41	19.68	19.66	18.98	19.53	19.7	19.5	19.27	19.23	19.42	19.67	19.62	19.8	19.82	19.38	19.74
Adenine	13.49	11.77		12.99	13.29	12.6	13.05	12.86	12.99		13.4	12.71	13.78	12.81	13.3	12.99		12.85	12.82	13.08
Adenosine-5-monophosphate	16.86	16.57	17.88	19.31	20.09	19.26	20.21	19.44	19.72	19.27		18.97	19.66	18.83	19.72	18.85	20.6	20.66	20.51	20.66
Alanine	17	15.31	16.04	16.61	16.33	16.45	16.65	16.58	16.56	16.71	16.74	16.38	15.85	16.58	17.06	16.56	17.26	17.38	16.97	17.01
alpha-Tocopherol	15.06	13.67	14.22	15.22	14.97	14.11	14.04	14.95	14.84	13.27	15.82	15.07	15.19		15.04	13.24		14.41	14.52
Annotation	1	4	8	15	19	21	25	30	32	34	2	5	13	14	18	23	27	28	36	39
Arachidonic acid (also Eicosapentaenoic acid)	17.78	18.19	17.21	17.43	17.76	17.84	16.63	17.61	17.86	16.09	17.61	17.09	17.76	17.82	16.87	17.38	17.1	17.63	16.17	17.2
Aspartic acid 1	18.24	14.49	17.34	18.68	18.34	18.98	19.06	18.86	18.43	18.39	18.55	18.91	18.79	17.78	18.77	19.33	18.9	19.11	18.8	18.84
Aspartic acid 2	19.06	18.39	18.49	19.21	19.08	18.93	19.56	19.61	19.13	19.16	19.23	19.63	19.43	19.47	19.6	19.92	19.67	19.94	19.61	19.19
Cadaverine	13.77	13.98	14.16	14.71	14.86		13.18	10.9	13.6		13.42	12.51	14.71	13.63	13.89		13.29			14.68
Campesterol	13.41		13.4	14.38	15.86	12.45	12.82	15.21			14.53	14.98	14.85	12.06	15.14	15.36	15.45	14.28	13.26	14.59
Cholesterol	21.34	20.49	20.49	21.52	21.67	21.39	21.58	21.78	21.51	20.78	21.53	21.48	21.62	21.7	21.34	21.58	21.7	21.81	21.34	21.39
Citric acid/isocitric acid	15.92		16.36	15.48	17.38	17.42	16.36	16.25	16.33	14.64	16.84	16.5	17.45	16.43	16.76	15.24	17.41	17.33	16.93	17.97
Creatinine	19.95	18.9	18.84	19.66	19.31	19.22	19.85	19.2	19.37	19.06	20.42	19.76	19.94	19.55	19.75	19.83	19.93	19.59	19.69	19.45
Dehydroascorbic acid	15.43	14.48	14.72	16.29	15.79	14.86	16.68	16.2	15.79	14.8	16.13	15.77	15.69	15.03	15.98	15.12	16.32	15.77	15.35	14.31
Docosahexaenoic acid		17.01			16.58	16.6	16.39	16.78	15.69	15.09	16.08	16.71	16.81	16.92	15.67	16.29	16.1			16.06
Eicosapentaenoic acid	17.78	18.19	17.21	17.43	17.76	17.84	16.63	17.61	17.86	16.09	17.61	17.09	17.76	17.82	16.87	17.38	17.1	17.63	16.17	17.2
Ethanolamine		11.6		14.42	13.63	14.85	13.19	13.86	15.22	12.57			14.08	14.37	12.48	14.11	13.32	13.83	13.14	13.93
Fructose or similar ketohexose	22.99	21.4	22.83			23.54	23.54	23.12	23.06	23.57	23.31	22.91	23.4	23.35	23.15	23.51		23.56	23.35	23.7
Fructose-6-phosphate	14.3	14.19	14.8	15.02	16.62	15.17	16.22	15.66	15.15	15.19	15.65	15.16	16.22	16.17			16.65	16.98	15.69
Fumaric acid	12.26		11.75	13.4	14.21	13.51	14.34	14.11	13.73	12.87	13.34	12.98	14.41	13.77	13.43	13.47	14.82	14.63	14.24	14.27
Gluconic acid-6-phosphate	14.3	14.19	14.8	15.02	15.76	15.17	16	15.66	15.15	15.19	15.65	15.43	15.75	16.17	14.79	15.17	15.79	16.2	15.69	15.85
Glucose and other aldohexoses 1	22.99	21.4	22.83	23.29	23.38	23.54	23.54	23.12	23.06	23.57	23.31	22.91	23.4	23.35	23.15	22.69	23.36	23.56	23.35	23.7
Glucose and other aldohexoses 10	20.56	19.01	20.42	20.84	20.99	21.22	21.11	20.57	20.64	21.09	20.93	20.51	20.88	20.98	20.67	21.1	20.99	21.12	20.96	21.27
Glucose and other aldohexoses 11	20.56	19.01	20.42	20.84	20.99	21.22	21.11	20.57	20.64	21.09	20.93	20.51	20.88	20.98	20.67	21.1	20.99	21.12	20.96	21.27
Glucose and other aldohexoses 12	20.56	19.01	20.42	20.84	20.99	21.22	21.11	20.57	20.64	21.09	20.93	20.51	20.88	20.98	20.67	21.1	20.99	21.12	20.96	21.27
Glucose and other aldohexoses 13	20.56	19.01	20.42	20.84	20.99	21.22	21.11	20.57	20.64	21.09	20.93	20.51	20.88	20.98	20.67	21.1	20.99	21.12	20.96	21.27
Glucose and other aldohexoses 14	20.56	19.01	20.42	20.84	20.99	21.22	21.11	20.57	20.64	21.09	20.93	20.51	20.88	20.98	20.67	21.1	20.99	21.12	20.96	21.27
Glucose and other aldohexoses 15	20.56	19.01	20.42	20.84	20.99	21.22	21.11	20.57	20.64	21.09	20.93	20.51	20.88	20.98	20.67	21.1	20.99	21.12	20.96	21.27
Glucose and other aldohexoses 2	20.56	19.01	20.42	20.84	20.99	21.22	21.11	20.57	20.64	21.09	20.93	20.51	20.88	20.98	20.67	21.1	20.99	21.12	20.96	21.27
Glucose and other aldohexoses 3	16.41	14.91	16.82	16.9	17.02	17.61	17.18	16.85	16.63	17.32	17.22	16.94	17.13	16.99	16.62	17.64	16.65	17.08	16.2	17.13
Glucose and other aldohexoses 4	22.99	21.4	22.83	23.29	23.38	23.54	23.54	23.12	23.06	23.57	23.31	22.91	23.4	23.35	23.15	22.69	23.36	23.56	23.35	23.7
Glucose and other aldohexoses 5	22.99	21.4	22.83	23.29	23.38	23.54	23.54	23.12	23.06	23.57	23.31	22.91	23.4	23.35	23.15	22.69	23.36	23.56	23.35	23.7
Glucose and other aldohexoses 6	22.99	21.4	22.83	23.29	23.38	23.54	23.54	23.12	23.06	23.57	23.31	22.91	23.4	23.35	23.15	22.69	23.36	23.56	23.35	23.7
Glucose and other aldohexoses 7	22.99	21.4	22.83	23.29	23.38	23.54	23.54	23.12	23.06	23.57	23.31	22.91	23.4	23.35	23.15	22.69	23.36	23.56	23.35	23.7
Glucose and other aldohexoses 8	22.99	21.4	22.83	23.29	23.38	23.54	23.54	23.12	23.06	23.57	23.31	22.91	23.4	23.35	23.15	22.69	23.36	23.56	23.35	23.7
Glucose and other aldohexoses 9	22.99	21.4	22.83	23.29	23.38	23.54	23.54	23.12	23.06	23.57	23.31	22.91	23.4	23.35	23.15	22.69	23.36	22.15	23.35	23.7
Glucose-6-phosphate	14.3	14.19	14.8	15.02	16.62	15.17	16.22	15.66	15.15	15.19	15.65	15.43	16.22	16.17	14.79	15.17	15.79	16.2	15.69	15.85
Glucose-6-phosphate or similar	14.3	14.19	14.8	15.02	16.62	15.17	16.22	15.66	15.15	15.19	15.65	15.43	16.22	16.17	14.79	15.17	15.79	16.2	15.69	15.85
Glutamic acid 1	20.75	20.06	20.16	20.83	21.15	20.81	21.09	20.91	20.93	20.61	21.1	20.8	21.24	21.15	20.73	21.09	21.28	21.61	20.95	20.81
Glutamic acid 2	19.35	19.11	19.02	20.1	20.23	20.01	20.32	19.72	19.98	19.37	20.27	19.53	20.24	19.88	19.21	19.83	20.29	20.41	19.68	19.82
Glutamic acid 3	18.86	16.57	17.49	18.6	18.05	18.79	18.53	18.22	18.3	18.3	18.92	18.43	18.36	19.4	18.34	18.37	18.59	18.85	18.73	18.51
Glutamine 1		17.78	16.81	16.82	17.97	16.15	17.22	17.58	17.61	14.2	16.27	16.31	17.02	16.17	16.17			16.12	16.02	14.21
Glutamine 2	20.37		17.91	19.82	19.66	19.92	20.33	19.5	19.61	19.83	20.06	19.67	19.96	19.96	19.8	19.2	20.41	20.13	19.73	20.3
Glutamine 3	15.28	14.67	15.7	17.39	16.69	17.45	17.25	16.43	16.76	15.29	17.65	18.61	17.44	17	17.57	17.25	18.59	18.85	16.29	16.34
Glycerol 1-phosphate	15.75	15.71	15.54	15.44	16.34	16.15	15.92	16.32	16.21	15.22	16.28	16.16	15.96	16.28	15.96	15.42	16.7	16.45	15.92	16.15
Glycine	14.64	14.89	15.04	16.68	16.57	16.66	16.41	16.52	16.63	16.62	15.46	16.27	16.73	16.75	16.8	17.41	16.73	16.94	16.7	17
Heptadecanoic acid/Octadecanol 1	15.41	13.81	14.76	14.78	14.6	14.8	14.89	15.08	14.8	14.99	15.28	14.65	12.72	13.98	15.62		15.44	16.05	15.3	15.17
Hexitols 1			15.69	16.14		16.44	16.42	15.8	15.72	16.52	14.79	15.65	15.92	16.31	15.84				16.25	16.65
Hexitols 2			16.82	16.9	17.02	17.61		16.85	16.63	17.32	17.22	16.94	17.13	16.99	16.62	17.64		17.08	16.2	17.13
Hexitols 3	20.56	19.01	20.42	20.84	20.99	21.22	21.11	20.57	20.64	21.09	20.93	20.51	20.88	20.98	20.67	21.1	20.99	21.12	20.96	21.27
Hexitols 4	20.56	19.01	20.42	20.84	20.99	21.22	21.11	20.57	20.64	21.09	20.93	20.51	20.88	20.98	20.67	21.1	20.99	21.12	20.96	21.27
Hexitols 5	20.56	19.01	20.42	20.84	20.99	21.22	21.11	20.57	20.64	21.09	20.93	20.51	20.88	20.98	20.67	21.1	20.99	21.12	20.96	21.27
Histidine	14	12.88	13.6	15.36	15.11	14.79	16.22	14.35	15.4		15.88	15.25	15.7	15.2	15.05	15.28	15.17	16.08	14.18	14.46
Hypotaurine	15.09	15.19	16.58	17.27	17.42	17.67	17.4	17.5	16.87	17.19	15.05	15.91	16.76	16.56	16.91	17.07	18.14	17.97	17.28	17.98
Lactic acid	17.43		16.72	16.54	16.71	16.83	16.7	16.3	16.89	16.52	17.65	17.12	16.78	16.95	17.11	16.37	17.16	17.14	17.48	17.05
Linoleic acid	17.03	16.88	16.78	15.54	17.12	17.09	16.76	17.15	17.19		17.3	17.01	17.72	16.17	15.4	16.5	17.18	17.05		16.75
2-Hydroxyglutaric acid	15.2	20.06	20.16	20.83	21.15	20.81	21.09	20.91	20.93	20.61	21.1	20.8	21.24	21.15	20.73	21.09	21.28	19.01	20.95	20.81
Spermidine 1	13.58		15.25	16.98	16.26	15.74	16.35	16.54	16.69	15.91	15.19	16.17	16.87	16.85	16.49	16.9	17.05	16.62	16.27	16.33
Lysine 1	13.77	13.98	14.16	14.71	14.86		13.18	10.9	13.6		13.42	12.51	14.71	13.63	13.89		13.29			14.68
Lysine 2	17.39	17.45	16.97	18.21	18.82	18.46	18.12	17.25	18.49	16.99	17.74	17.03	18.29	17.26	18.13	17.2	17.79	18.88	17.77	18.5
Malic acid			15.4		16.67	16.98	16.09	16.2	15.83	15.18	17.16	15.95	16.64	16.53	16.41	15.46	17.55	17.09	15.78	16.7
Myoinositol	18.34	17.32	17.84	18.75	18.87	18.93	18.99	19.4	18.65	18.37	19	18.73	19.02	19.33	19	19.42	19.32	19.08	18.83	19.15
O-Methylphosphate	13.37		14.58	15.89	16.04	16.12	16.13	15.96	15.4	15.65	15.46	14.31	15.87	16.1	14.86	16.34	16.03	16.42	15.02	15.79
O-Phosphocolamine			15.15	17.06	17.33	17.04	17.45	17.58	17.63	17.09		15.43	17.23	16.75	17.12	17.54	17.75	17.86	17.65	17.99
Pantothenic acid	14.76	12.44	14.34	14.12	15	13.86	14.61	15.43	15.43	14.51	15.07	15.65	15.75	15.31	14.91	15.44	16.4	15.03		14.44
Phosphoric acid	22.22	21.11	21.24	21.95	22.25	21.98	22.35	22.02	22.31	21.92	22.5	22.26	22.33	21.97	22.32	22.1	22.88	22.73	22.63	22.84
Proline	15.08			13.22	14.19	15.1	13.82	12.32	13.15	12.2	14.5	13.64	12.79	13.63	13.47	13.97	13.29	14.95	14.46
Pyrophosphate	17.79	17.32	18.21	18.85	19.46	18.96	19.42	18.95	18.8	18.49	18.94	19.17	19.47	18.88	18.95	19.2	19.77	19.78	18.68	19.08
Serine	14.97	14.75	15.04	15.72	16.15	16.01	16.51	16.7	16.12	16.21	17.02	17.29	16.07	17.42	16.23	17.36	17.08	16.44	17.21	16.79
Siloxanes			11.25		12.6	13.31	12.2	14.28	13.6	13.51				12.02	13.18	13.51	13.57	12.63	13.68	13.98
Spermidine 2		15.35	15.38	16.12	14.76	15.06	15.17	15.71	16.09	15.29	14.57	15.53	15.8	15.94	15.91	15.81	16.03	15.56	15.54	14.95
Heptadecanoic acid/Octadecanol 2	15.41	13.81	14.76	14.78	14.6	14.8	14.89	15.08	14.8	14.99	15.28	14.65	12.72	13.98	15.62		15.44	16.05	15.3	15.17
Stearamide	15.57	15.71	15.71	16.71	16.38	16.29	16.07	16.15	16.4	15.29	15.82	15.97	16.61	16.26	15.58	16.03	15.78	16.1		15.95
Taurine	17.42	21.27	21.07	20.28	20.98		20.31	21.24	20.96	21.15	19.35	19.92	19.68	19.59	20.83		20.73	21.13	20.92
Threonine 1	15.84	15.11	14.57	15.47	16.54	16.15	16.04	15.29	15.73	15.21	16.11	15.37	15.61	15.7	15.54		16.07	16.58	16.33	15.66
Threonine 2	15.84	15.11	14.57	15.47	16.54	16.15	16.04	15.29	15.73	15.21	16.11	15.37	15.61	15.7	15.54		16.07	16.58	16.33	15.66
